# Supplementary material for: Multi-Omics Profiling Identifies Biomarker Candidates and Pathogenic Divergence Between Post-Transplant Diabetes Mellitus and Type 2 Diabetes
Source: Research Square preprint supplement (doi:10.21203/rs.3.rs-7682951/v1), 2025-10-10
Supplement: Supplementary file 1 [file 2b95b9832c73b7d6d97c1e81.docx]

**Supplementary Table 1**: The antibody used in the FACS.

| **Name** | **Citation** | **Supplier** | **Cat no.** |
| --- | --- | --- | --- |
| TruStain FcX™ (anti-mouse CD16/32) Antibody | RRID: AB_1574975 | Biolegend | #101320 |
| APC/Fire™ 750 anti-mouse CD45 Antibody | RRID: AB_2572115 | Biolegend | #103153 |
| FITC anti-mouse CD3 Antibody | RRID: AB_312660 | Biolegend | #100203 |
| PerCP/Cyanine5.5 anti-mouse CD4 Antibody | RRID: AB_893332 | Biolegend | #100539 |
| PE anti-mouse FOXP3 Antibody | RRID: AB_1089118 | Biolegend | #126403 |

RRID means Research Resource Identifier.
