# Supplementary material for: Multi-Omics Profiling Identifies Biomarker Candidates and Pathogenic Divergence Between Post-Transplant Diabetes Mellitus and Type 2 Diabetes
Source: Research Square preprint supplement (doi:10.21203/rs.3.rs-7682951/v1), 2025-10-10
Supplement: Supplementary file 2 [file bcb4401c1f5606c64444d443.xlsx]

## Sheet: Sheet1
Only Fat	Only Pancreas	Only Liver	Fat AND Pancreas NOT Liver	Fat AND Liver NOT Pancreas	Pancreas AND Liver NOT Fat	Fat AND Pancreas AND Liver
Pax5	Rbpms2	Bclaf1	Cldn1	Cnp	Gnaz	Syt13
Il22ra2	Hmgb3	Usp19	Cenpa	Ccr6	Itga2b	Igkv8-19
Fcer2a	Parvb	Tecpr2	Ces2e	Cd79b	Vwf	Ngp
Gm4294	Gp5	Met	Runx3	Tnfrsf13c	Dysf	Mmp25
Cxcl13	Alox12	Fgfr3	Pglyrp2	B3gnt5	Reps1	Mpo
Timd4	Vcl	Zhx3	Angpt1	Il9r	Gp1bb	Camp
Nsg2	Cttn	Eif3a	Rag1	Cr2	Kalrn	Nfasc
Fcrl1	Proser2	Isyna1	E2f2	Tbc1d10c	Selp	Cd177
Bcl2	Wfdc21	Micu1	Igkv8-27	Prkcb	Syne1	Ighv1-5
Btla	Sord	Ash2l	Arhgap19	Sell	Lilr4b	Igkv8-21
Ighd	F10	Ptk2b	F8	Mal	Adgrg1	Ly6c2
Arnt2	Mpig6b	Fam168b	Gfod2	Ccl19	Ltf	Slc14a1
Dsc3	Serpina3b	Pum2	Sema4a	Cd8b1	Thbs1	Ifitm6
Ltb	Pf4	Cep170	Glrx	Spn	Rgs18	Plek
Cd22	F2rl2	Ppp1r18	Mcpt4	Napsa	Tuba8	Pglyrp1
Chst3	Ufsp1	Larp1	Cma1	P2ry10	Elane	Ctsg
Gm38244	Adgrg3	Rtn4rl1	Kif2a	Pla2g2d	Lmna	Chil3
Siglech	Rab27b	Myo9a	Haspin	Xlr4a	Itgb2l	Igkv8-28
Dapl1	Nlrp6	Hid1	F5	Gpr174	P2rx1	Fermt3
Ikzf3	Celf1	Farsb	Cysltr2	Cyfip2	Gmpr	Shisa5
Bank1	2610528J11Rik	Rasal1	Ifi47	Gal3st2	Asap1	Gcsam
Cd209b	Cebpe	Arhgap1	Igll1	Trbc2	Slc2a3	Dnajc7
H2-Ob	F11r	Arhgef2	Gata1	Ripor2	F2rl3	Cd300e
H2-Eb2	Lonp2	Smim24	Unc13d	Lef1	Lin28a	Ighg1
Fcrla	Ripor3	Ect2	Prox1	Traf3ip3	Trpc6	Eml4
Ptprcap	Cass4	Synm	Il1r2	Itgal	Lcn2	Igkv6-17
Pou2af1	Ppbp	Acap2	Igkv3-7	Rac2	S100a8	Clec1b
Cacna1i	Lims1	Serpinb9	Cpa3	Vpreb3	Smim3	Tfpi
Tbc1d4	Mrvi1	Nfatc2	Amigo1	Arl5c	Itga5	Ighv10-3
Blk	Gp1ba	S100pbp	Dek	Tspan32	Tmem126a	Clec5a
A530030E21Rik	Lig3	Senp3	Ppp4r3a	Satb1	Pde5a	Sirpb1c
Grap2	Mfsd2b	Atf2	Slamf1	Fam78a	Ankrd35
H2-Q5	Itgb3	Col3a1	Ubash3b	Ptprc	Klf5
Unc5c	Mgam	Adar	Reln	Coro1a	Fip1l1
Cd4	Tubb1	Chka	Uhrf1bp1l	Adgre4	Msr1
H2-Q7	Med12l	Ly6c1	Ncam2	Cd27	4930438A08Rik
Ccr7	Nomo1	Lair1	Asxl2	Lax1	Epb41
H2-DMb2	Gucy1b1	Angel2	Slc35d3	Il21r	Ly6g
Carmil2	Actl6a	Cplane1	Lipg	Adam11	Abca13
Il4i1	Fam83h	Eps8	Ighv10-1	Skap1	Mmp9
Grem1	Myl9	Tox2	Tenm3	Clcf1	Cited4
Zfp831	Tmem40	Ptpro	Dapk1	Parvg	Osgin1
Icos	Mtus1	Ighv1-74	Ache	Cd37	Pnkp
Siglecg	Mpl	Pafah1b3	Pik3c2b	Cd6	Slpi
Rasgrp1	Mapk6	Shoc2	Wipf2	Igkv6-20	Prtn3
Nrn1	Inafm2	Cd14	Gatm	Gpr132	Retnlg
Xlr4b	Ubap2	Mafk	Ighv7-1	Senp7	Slco4c1
Fcmr	Sgms2	Adgrl3	Ighv1-42	Lrmp	S100a9
Trbc1	P2ry1	Fkbp11	Ildr2	Slfn8	Prdx5
Itk	Bahcc1	Adap1	Slc6a4	Pacsin1	Ssx2ip
Slamf6	Sirt4	Chpf2	Rbm4b	Cd40	Tmem151b
Glycam1	Gp9	Fndc10	Cdk6	Mef2c	Tln1
Calm4	Zswim5	Krt20	Tmprss3	Wdfy4	Card9
Arhgap4	Gas2l1	Osbpl7	Fnip1	Draxin	Ighv5-17
Acap1	Mob1b	Cul5	Igkv16-104	Fnbp1	Flna
Itgb7	Gsdme	Hnrnpc	Chdh	Pou2f1	Ighv1-4
Gbp2b	Zyx	Igf2	Slco4a1	Donson	Cdkn2d
Fam169b	Tpk1	Zfp827	Dmkn	Gm30211	Slc22a3
Ifi209	Dstn	Ric8a	Zfp296	Pmaip1	Mmp8
Plcl2	Anxa1	Arntl	Usp7	Cyp26b1	Nprl3
H2-Oa	Aqp9	Agbl5	Ighv2-2	Siglec1	Emilin1
Ighg3	Fn1	Macf1		Dok3	Agpat5
Prkg2	Gcnt2	Ctse		Tmc8	Dennd4a
Septin1	Acadvl	Gpr176		Sp110	Elovl7
Cxcr5	Lrrc32	Celf2		Rhof	Ms4a3
Flt3	Rhou	Ckap5		Trbv12-2	Anxa3
Lck	Tuba4a	Tmem43		Ighv1-82	Padi4
Ifi206	Ly6g6f	Smo		Nlrc4	Mia2
Mdm4	Fbxl2	Aldh1a3		Tbxa2r	Otud6b
Oprd1	Por	Dbf4		Tlr1	Cd9
Ncoa3	Reep2	Jpt1		Mzb1	Nlrx1
Marco	Lgalsl	Rps12		Ccr9	Hsd3b7
Zap70	Tank	Lpl		Ly9	Shisa6
Rasal3	Ltb4r1	Iffo1		Cd72	Cald1
Cd3e	Morn2	Tmem154		Igkv10-96	Pram1
Gm16685	Slc24a5	Klc1		Ighg2c	Fcnb
Gimap3	Hacd1	Rtl5		S1pr4	Prune2
Bach2	Ankrd22	Cic		Foxp3	Stfa2l1
Rhoh	Cd302	Fgfr1		Serpina3g	Pi16
Epsti1	Grtp1	Fbn2		Pld4	Cux1
Stab2	Mogat2	Lpin1		Crebbp	Mvb12b
Spic	Exoc3l2	Dst		Zfp740	Wfdc17
Frat1	Treml1	Mfsd4a		Hpse	Prmt1
Ccl5	Osbpl1a	Rnf144a		Fmnl1	Clec4e
Irf4	Kcnj5	Serpinb6b		Rassf5	Magi1
Gm1966	Tspan12	Bhlha15		Cd5l	Fcgr4
Samsn1	Pbx1	Add2		Mical1	Rundc3a
2900052N01Rik	Hook2	Hip1		Ighv1-76	Sowahb
Cd79a	Dach1	Sirpa		Gmfg	Phldb1
Ppm1k	Tbc1d2	Mbnl2		Bst1	Fhl1
Tcf7	Atg9a	Tmem229b		Gimap1	Slc16a3
Stat4	Atp6v1a	Shisa2		Cfp	1700020L24Rik
Haao	Asap2	Ms4a8a		Neurl3	Prok2
St8sia1	Frrs1	Zfp532		Pml	Fbxo6
Ifi213	Adtrp	Dip2a		Ralgps2	Cds2
Il2rg	Csgalnact1	Hace1		AI467606	Mcemp1
Gm15987	Ston2	Setdb1		Ighv6-3	Lgals3
Treml2	Fndc4	Rab11fip4		Cd48	Ssbp4
Lat	Phka2	Spns3		Cd300ld5	Trf
Pou2f2	Pygl	Gas7		Kdm3a	Dhrs9
Clec2i	Lyl1	Pcdh9		Fgd3	Rps2
Trac	Slc6a3	Ret		Zc3h12d	Gsn
Gm20559	Hpn	Procr		Ptpn6	Osbpl9
Emx2	Igkv4-63	Ggps1		Derl3	B4galt6
Ikzf1	Mapk13	Scn5a		Myo1g	Vav3
AI504432	Cc2d2b	Mtf1		Arhgap30	Csf2ra
Spib	Serpinb10	Ubxn10		Psd4	Cxcl5
Slc28a2b	Mapk4	Zbtb4		Arhgef1	Zfp385a
Cd3d	Nol4l	Zbtb25		Calhm6	Fpr2
Igkv4-68	Dock1	Tpx2		Ptbp3	Anapc5
Serpina1b	P3h1	Tmed9		Epb41l3	Src
Kbtbd11	Rsu1	Dclk1		Syk	Vcan
Tmem131l	Rhpn2	Sult1e1		Zkscan3	Pigb
Srpk3	Saa3	Srgap2		Igkv9-120	Muc13
Ms4a4c	Daam1	Efemp2		Snx20	Atp2c1
Adgrg5	Cyp2b10	Mthfd2		Cntrl	Dok2
Arhgap15	Hgf	Ctss		Sfi1	Nfe2
Apol7c	Tacc1	Tnxb		Mrtfa	S100a6
Cxcl12	Pigp	Acin1		Igkv4-79	Ttbk2
Angptl7	Lbp	Slc7a4		Vav1	Tnfaip2
Fcho1	Igkv1-122	Fam129b		Xlr4c	Golga2
Khnyn	Map7	Cyp4f16		Cd53	Fbxl5
Tnfsf8	Rap1b	Cep170b		Zbtb5	Dio2
Tmem26	Cyp4b1	Eno3		Aim2	Trem1
Nxpe3	Gp6	Tmem176b		L1cam	Clec4a2
Ctla4	Tfpi2	Mad2l2		Ctdspl2	Trim16
Ifi44	P2ry2	Chst11		Vamp5	Atp1a3
Serpina10	Rac1	Ahcyl2		Ccdc88b	Hacd4
Kdm7a	Shank2	Csf2rb		Ighv14-4	Tarm1
Havcr1	Inpp5a	Zfp251		Add3	Egfl7
Gm49602	Acsl1	Grk5		Cd80	Fam219a
Sh3gl3	Mfsd11	Rbm43		Cabp4	Acod1
Septin6	Chst13	Cacnb3		Rinl	Tspan9
Il12a	Hp	Ttc13		Susd3	Pls1
Ccl22	Naxd	Eme2		Tnfrsf9	Zbtb7b
Gm8221	Btbd9	Cd300a		Clec4n	Gpx3
Stk17b	Gfra1	Commd7		Il10ra	Pdgfb
Igkv4-74	Inhba	Vsig10		AB124611	Itgam
Dpp4	Plekha8	Kcnip3		Plcg2	Rab40c
Sema3d	Kif13a	Lama5		Psip1	Lrrc28
Cd8a	Myct1	Crlf2		Fgr	Palm
Ms4a4b	G3bp2	Ccl11		Lsp1	Abca4
Dtx1	Rilp	Ppat		Fam189b	Slc45a4
Sash3	Nit1	Klhdc8a		Nfkbie	Csrp1
Tespa1	Prlr	Icam1		Jak3	Fam32a
Cd19	Pde3a	Usp53		Hps3	Nxpe4
Bfsp2	Fam217b	Ptgir		Prex1	Gm42517
Cmah	Megf9	Slc39a13		Usp28	Atp11a
Bcl11b	Sec14l1	Aplp1		Myo16	Mindy1
Tox	Rida	Actb		Fgd2	Igha
Cd69	Ltbp1	Atp13a2		Sirpb1a	Cep97
Card11	Nfia	Clec14a		Glipr2	Pkm
Tnfrsf4	St3gal5	Eef1d		Zfp169	Rps6ka2
Fcrl5	Gramd1c	Aen		Inpp5d	Cep128
Acacb	Myom1	Cdc42ep5		Nxpe2	Pard3
5830411N06Rik	Htr2a	Kcnh6		Orai2	Card10
Lrp8	Rnf149	Cabyr		Relb	Ccl2
Itga4	Plxna4	Tctn1		Ccl8	Kat7
Gm50230	Ctnna1	Creg1		Ighv1-54	Vill
Nlrc3	Ceacam1	Cep55		Gal3st2c	Csf3r
Trim12a	Olfml2b	Shc2		Laptm5	Hfe
Gimap7	Dda1	Hs3st2		Fam49b	Smox
Arhgap45	Dmxl2	Mmp7		Atcay	Morf4l2
Colq	1600014C10Rik	Bud23		Ndor1	Nlgn2
Fut7	Sytl4	Abtb2		Trpm2	Derl1
Themis	Tpm4	Camk2g		Ighv1-18	Creb3
Klrd1	Slco2b1	Slc6a8		Rgs14	Creb5
Ciita	Olfm4	Gpm6b		Gpr68	Arrb2
Cd3g	Cyb5a	Sat1		Lrrcc1	Eif5a
Cxcr6	Cbr4	Gm1673		Gm9733	Scn1b
C1ql3	Gsr	Nudt18		Vamp1	Galnt1
Jakmip1	Camk1	Clba1		Rgs9	Srrm1
Crtam	Tm7sf3	Rims3		Was	Mpp7
Gpr88	Stard13	Ly6d		Lcp1	Tnfrsf21
Slc15a4	Tmem169	Serpina7		Igkc	Cltc
Mcoln3	Wnk4	Tmem132a		Mitf	Slfn4
Ipcef1	Agrn	Ppp1r9b		Rbm5	Scel
Cd5	Dgkg	Igkv6-15		Fam167a	Epha1
Gpr18	Itga2	Ttc9		Phf21a	Gatad2a
Bin2	Nadk	Ckb		Frzb	Emilin2
Gimap1os	Serpina11	Tet1		Igkv19-93	Cyp2d10
Kmo	Rab44	Eml3		Ighv2-5	Sema4c
Ms4a1	Prkar2b	Htra2		Nfatc2ip	Stox2
Sit1	Epx	Gm20075		Tmem71	Nedd4l
Gm8369	Ctnnal1	Grip1		Ighv9-3	Bcar1
Il2rb	Timp3	Lpcat2		Igkv12-98	Sort1
Dnase1l3	Rcor2	Psat1		Tcp11l2	Liph
Trbv19	Bmx	Gdpd5		Ighv1-61	Elmo2
Ighv1-7	Sec14l5	Psrc1		Exosc8	Pign
Cd2	Mdm1	Serpini1		Hnrnpl	Tubb4b
Spock3	Pde4d	Cldn4		Ppp1r16b	Rcbtb2
Nxph1	Mxi1	Pdgfc		Cacna2d4	Csnk1e
Kcna2	Ppif	Nptx1		Ptger1	Hsd11b1
Igkv8-30	Ptprd	Zfp131		Tmem156	Plscr3
Cd28	Olr1	Tesc		Cd180	Dusp16
Mir142hg	Slc44a1	Slc2a6		Ddn	Arl6ip4
Gm11346	Tpm1	Atf5		Galnt6	Sox4
Herc6	2610001J05Rik	Ddx46		Rubcn	Shc1
Ighv1-19	Sult2a3	Slc35b1		Igkv14-111	Ckap4
N4bp2	Tom1l1	Slamf7		Rfx3	Tkt
Ncmap	Bcr	Slc5a11		Atp8b5	Pard6a
H2-T10	Trem3	Arfip2		Cdc42se2	6430548M08Rik
Clec4g	Gab1	Ltbp2		Lbr	Diaph1
Sp4	Fgg	Adgre5		Cd300ld4	Epb41l1
Ighv1-12	Pdlim7	Tjap1		Dazap1	F13a1
Tnfrsf14	Ifitm3	Mpzl1		Il7r	Pdgfd
2010016I18Rik	Pafah2	St6galnac4		Ighv1-52	Cemip
Serpina1e	Gpr84	Cacnb1		Fbxo5	Celsr3
Ntrk1	Arhgap6	Tmem252		Nfkb2	Cbln3
Sla2	AI182371	1700017B05Rik		Arid4b	Hp1bp3
C3	Pgghg	Rab11fip5		Iglc2	Rit1
Peli1	Pros1	Sgsh		Asprv1	Ighv3-8
Rab30	Alas1	Map3k9		Btbd11	Rab7
Gal3st2b	Scarf1	Orm2		Zdhhc23	Asns
Tlr9	C5ar1	Rasl10b		Cybb	Ccr1
Shisa3	Fads2	Cdc123		1110032F04Rik	Tie1
Izumo1r	Aldh1l1	Lmbrd1		Trim30b	H2ac11
Gpr141	C1rl	Coq8a		Plac8	Tyrobp
Tnfrsf13b	Tmem164	Ksr2		Pycard	Dlg5
Cldn11	Ophn1	F2rl1		Csnk1g1	Iglv1
Wnt6	Ocrl	2510009E07Rik		Ighv1-64	Blcap
Plcb2	Acy1	Krt80		Slc4a8	Ktn1
Sh2d2a	Tgfb1i1	Bax		Arhgef18	Arrb1
Igkv13-85	Flot1	Ighv14-3		Col11a2	Mapre1
H2-Q6	Nhsl2	Gpx2		Inpp5f	Myef2
Gm4759	Cpd	Csf1r		Thrap3	Aprt
Ifi208	Cavin2	Fblim1		Dclk2	Picalm
Cnr2	Cdc42bpa	Trpm4		Slc38a1	Atg7
Igkv2-137	Gk	Nop56		Ikbke	Rpap2
Prpf38b	Mapk3	Ccdc92		Pde1c	Cxcr2
Gm38077	Gjb2	Slc8a1		Armcx4	Ehbp1l1
Gsdmd	Cpne2	Tmc3		Dennd4b	Tcf19
H2-M3	1810058I24Rik	Armc9		Stx11	Pla2g4a
Cd86	Sele	Myo6		Irf5	Cela1
Il27ra	Pde7b	Castor2		Rab37	Trim47
AU020206	Cldn12	Rtn4		Gdf11	Sdcbp
Pagr1a	1110065P20Rik	Cldn7		Ighg2b	Npas2
Pld5	Scamp1	BC004004		Wipf1	Tex15
Lsmem2	Glt1d1	Epdr1		Tcf3	Septin9
Gfi1	Adpgk	Ripk3		Ighv1-72	Exoc6
Gm9531	Sdsl	Scube1		Cdca5	Rhov
A630001G21Rik	Hnrnpll	Ighv1-50		Pou6f1	9530068E07Rik
P2ry12	Nckap1	Trib3		Spi1	U2af1l4
Itgae	Pcdh1	Fndc3b		Cdc7	Ppp2r3d
Suz12	Hsf4	Mgat5		Abcg1	Ptprn
Rubcnl	Klf11	Samd10		Cep68	Coro2b
Notch2	Gatad1	Ebf4		Lmo2	Phc2
Rasgef1a	Dhrs3	Shank1		Smc4	Patj
Irf7	Kcnf1	Igf2bp2		Ighv1-62-2	Nlgn3
Astn1	Qdpr	Phykpl		Grk6	Cdip1
Klrk1	Pcsk6	Rbm3		Tk2
Cst7	Cdr2l	Adamdec1		Hvcn1
Dnah8	Gfod1	Cldn2		Csf2rb2
Gm10240	Tmem53	Gpsm3		Nwd1
Kcnmb4	Cstdc4	Camk2a		Plekha5
Btg1	Napg	Set		Tifa
Traf1	Ppp1r3d	Ogdh		Jchain
Gm15675	Pdpk1	Tspan13		Tug1
Irf2	Akap1	Nucb2		Tcea1
Chst4	Ap3s1	Prxl2c		Nckap1l
Ifi214	Cyth3	Exoc3l4		Evi2
Zfp748	Msrb1	Ddit3		Plekha4
Uba7	Hspb6	Npnt		Nr1d1
Pnn	Entpd5	Esyt1		Adcy7
Nkpd1	Slk	Slc39a7		Arid4a
Chst10	Ptpn11	Dock10
Rsbn1l	5031439G07Rik	Brd3
Strip2	Wipi1	Zfp414
Map3k2	Arhgap18	Anxa2
Gpr171	Ambp	Dnajc12
Dennd1c	Rhoj	Cd151
5430427O19Rik	Alox15	Ildr1
Ppp1r3f	Dgat1	Pik3r3
P2ry13	Slc25a44	Ehmt1
Fbxl12	Ugt1a7c	Dnajc10
Flcn	Hax1	C1ql4
CT868690.1	Shmt1	St14
Gbp8	Ugt1a1	Nupr1
Trat1	Ilk	Aldh3b1
Kmt2a	Erg	Setx
Cd207	Dpf3	Cpne8
Sema3a	R3hdm4	S100a4
Pkib	Arrdc4	Cyba
Slc43a1	Rara	Nhp2
Rif1	Cdc42bpb	Rap2b
Nefh	Vash1	Ddr2
Kynu	Ttpa	Muc1
Ackr1	Amz2	Atp8a1
Zfhx2	Abhd5	Gipc2
Nr2f1	Prss34	Tm6sf1
Il12rb1	Ltb4r2	Rhod
Rnase6	Chst12	Zfp687
Dnah6	Fxyd1	Slc15a3
Ly6g5b	Cd59a	Stac2
Xlr5c	Arrdc3	Ikbkg
Tap1	Mafg	Lmnb2
Slco5a1	Cd300ld3	Cyth4
Pxk	Cxadr	Btg3
Sema4f	Ciao3	Tmem176a
Apol7e	Ptgr1	Sdk1
Serpinb1a	Afdn	Trp53bp1
Gm37310	Fbxo3	Xpo6
Oas3	Slc6a12	Prmt7
Ddx60	Myo18a	Nfe2l1
Map4k1	Pcyt1a	Riok1
Trgc1	Prickle1	B4gat1
Rsbn1	Mfsd13a	Gldn
Rel	Prss57	Adprh
Mndal	Gpr39	Ccdc88c
Gm28177	Arhgap10	Krt7
Lepr	Plppr3	Tfdp1
Kmt2d	Tmbim1	Slc16a7
Bpifb2	Qsox1	Capns1
Nlrc5	Ube2e3	Cacfd1
Gbp4	Mcpt8	Megf8
5830428M24Rik	Alox5ap	Aox4
Igkv4-55	Wdfy3	Lasp1
Coch	Gnaq	Mocs2
Gm49320	C530008M17Rik	Fhl3
Fam172a	Nacc2	Rcc2
Eomes	Ptov1	Manbal
BC043934	Sfxn5	Snn
Dscaml1	Slc18a2	Mbp
Trim59	Xdh	Septin4
F730311O21Rik	Kars	Hoxb3
BE692007	Ank3	Slc11a1
Ighv5-9	Ccno	Chgb
Pot1b	Arhgef10l	Men1
Med12	St7	Atp6ap1
Gm26740	Rab3d	Edn1
Zcchc18	Fbxo30	Zfand3
Akna	Usp46	Irak3
Ptpn7	Zfp219	Coro1b
Dusp2	Slc39a11	Afap1l2
Fam129c	Atxn2	Bckdk
Gpm6a	Stim1	Bsg
Prg3	Hdc	Pdpr
Gm43305	Eng	S100a11
Nkg7	Dsp	Fat1
Trdc	Adssl1	Slit2
Zfp292	Ankrd33b	Ntrk3
Cd96	Gla	Slc35f1
Fabp1	Samd4	Ptp4a3
Galnt12	Samd14	Tenm2
Gm21762	Pard3b	Evi5l
Pik3cd	Tgm1	Apobec3
Unc93a2	Serpine2	Dctd
Srrm2	Cks1b	Sarm1
Zcchc7	Bysl	Pthlh
Crlf3	Septin8	Iqcn
Arhgdib	S100a1	Emb
Klhl14	Rnf165	Ago1
Gm8995	H2az1	Col22a1
Ogt	Pxylp1	Gm49395
Pip4k2a	Mxd1	Mgst2
Ptpn22	Layn	Rdh12
Gm6264	Rab4a	Herc3
Ubash3a	Abcc2	Epcam
Slc9a7	Fam151b	Kif26a
Ifi203	Ccna2	Klf16
Sp100	Tinagl1	Flrt3
Jam3	Aff2	Mettl18
Ankrd10	Prkg1	Atl3
C2cd5	Lman2l	Wnt10a
Limd2	Tmc7	Trak2
Igkv4-86	Snap23	Tnfaip8l2
Klhl6	Fbxo9	Gne
Bicral	Ywhah	Arap1
Gimap4	Lrpap1	Tfeb
Gimap8	Dtna	Ehmt2
Oit1	Gnb2	Hdx
Baz1a	Knstrn	Slc52a2
Slc6a20a	Ifitm1	Nrg1
Map4k2	Zfyve9	Naaa
Etnk1	4931406C07Rik	Plekhg2
Il18	Adarb1	Bin1
Ms4a6b	Oaf	Rxfp4
Skint10	Phldb2	Ntpcr
Crmp1	Mnd1	Kif27
Cntf	Zfp958	Piezo1
Lyz1	Inf2	Abr
Ager	Csnk2a1	0610010K14Rik
Gmip	Ighe	Gprc5a
Srgap3	Fpr3	Arhgap27
Ffar1	Tbxas1	Mfge8
Igkv8-24	Brcc3	Zfp467
Pgap1	Gchfr	Tinf2
Cd7	Nbea	Adam8
Madcam1	Mospd3	Serpinb9b
Igkv17-121	Gstm1	Psmd11
Gpr183	Arap3	Gls
Adam33	Atpif1	Igdcc4
Cd52	Pm20d2	Stard6
Icosl	Egln3	Fam53b
Cd163l1	Arhgef37	Entpd1
Iglc3	Tex14	Tnfaip3
Grk2	Il1f9	Pars2
Xcr1	Slc43a3	Fgf23
Klk8	Zfhx4	Hnrnpf
Arhgap9	Gm16867	Pygb
Kcna3	Plet1	Tbcb
Irf8	Cdkn1a	Dnd1
Tmem108	Optn	Spcs2
Gstp3	Mpv17	Wdr24
Gm42870	Plscr1	Lzic
Gm20460	Zfp689	Ankrd54
Smchd1	Gng11	Ddhd1
5730488B01Rik	Ghr	Mfsd10
Nudt17	Gng12	Plpp7
Cd74	Arhgap23	Tmem65
Tigit	Csgalnact2	Aloxe3
4930426D05Rik	Ccnj	Scaf4
Ctsc	Atl2	Gatd1
Cyp1b1	1810055G02Rik	Sprr2a2
Gm37711	AI661453	Psmg4
Kcnc1	Rbm47	Itgb2
Cdkn1b	Wdr45	Fbxl16
Gramd1a	Stom	Med16
Bpifb3	Ccnd3	Cbr3
Gm15708	Cnnm2	Efnb3
Phf11b	Flot2	Pdp1
Trbv3	Kif26b	Pggt1b
Btk	Azin1	Cnnm3
Creg2	Gamt	Enah
Gabpb2	Dcdc2a	Slc10a3
Bco2	Dlg2	Sec61g
Xkrx	G6pdx	Tubb5
Gm50107	Sema4g	Fut8
Treml4	Dmwd	A4galt
Fchsd2	Selenbp1	Flywch1
Mefv	Fam57b	Kifc3
Plagl2	Fgfr1op	Zfp598
Insrr	Tmtc4	Zfp248
Mx1	Fnbp1l	Top3b
Snx29	Gclm	Supt5
Trbv13-1	Stxbp5	Fbxo21
Bcl2a1d	Mtx1	Gtpbp3
Phip	Epor	Asgr1
Brwd1	Evi5	Fam71f2
Zyg11a	Metap2	Mical2
Cxcr3	Dhcr24	Platr25
Slc1a2	Kif5b	Cse1l
Hmgb1-ps8	Hmgn2	Tff3
Mreg	B230118H07Rik	Vasp
Gm14286	Iqgap2	Ntf3
Taf4	Grina	Ighv1-20
Mctp2	Steap4	Galnt10
Mcoln2	Afap1l1	Iqgap1
Ly86	Slc22a23	Slc39a10
I730030J21Rik	Nedd4	Rpl10
Rictor	Eif2ak1	Clmp
Gm2682	Adora1	Cdhr4
Rfx5	Dcun1d3	Slco3a1
Gpr15	Lrrc46	Tsc22d1
Snx30	Rab31	Ppm1h
Arap2	Ptpn3	Sema7a
Gpr55	Slc40a1	C130050O18Rik
Cpsf6	Cd300lb	Afp
Slc7a11	Rassf8	Dmbt1
St6gal1	Rnf26	Rusc1
Lta	Mcf2l	Adgrb1
Igkv5-45	BC016579	Dram1
Dexi	Amd1	Lrtm2
Neto1	Pabpn1	Ttyh3
Ctsw	Myl6	Six4
Ifit1bl1	Park7	Ucp3
Zfp521	Myo1d	Ptpn9
Sh2d1a	Agl	Srxn1
Prf1	Etfb	Cd209c
Msl2	Tle1	Dlg3
Art2b	Cgn	Eif1a
Klrb1f	Kxd1	Rest
Ero1lb	Dnase1l1	Rab15
Cnot6l	Ctbp2	Pcgf2
Cfap43	Gda	Tssc4
Gm4070	Palld	Nkiras2
Klk1	Ppp6r3	Shkbp1
Pim2	Svip	Mcrip1
Trbv1	Sox13	Nrarp
H2-Ab1	Dgkz	Rab19
Arhgap27os3	Rnf11	Mpeg1
Rsrp1	Ulk1	Tm4sf1
Gm16675	Agfg2	Kcne4
Gm43197	Lta4h	Ercc2
Trim39	Ociad2	Slc4a7
Hhex	Tbc1d8	Htr7
Srgn	Lrrfip2	Zfp423
Phf7	Pth1r	Folh1
Sgpl1	Pkd1l3	Efna4
Pag1	Hk1	Plekhm2
Gm16170	Mpp2	Scn3a
Rasgrp3	Masp1	Slc7a6os
Cdk13	Psen2	Spp1
Ighv1-26	Clic4	Ighv5-12
Stap1	Inpp5j	Ddc
Fbrs	Utrn	Plaat3
Txk	Rtn3	AI429214
Gm19585	Cavin1	Nr2c2ap
Hsh2d	Ptpn12	Pyroxd2
Trgc2	Mgat4b	Tlr7
Trdv4	Adcy6	Ceacam2
Sp1	Slc51a	Cd300c2
Mllt10	Gucd1	Tgfa
Paxbp1	Pbld1	Bok
Chd2	Coq4	Clip2
Gm12407	Tmem246	Scd2
Sctr	Ccdc57	Plod1
Cd38	Tex2	Lrrc25
Swap70	Sgsm1	Phgdh
Ets1	Gask1a	Nectin1
Nudt16	Slc2a9	Chtf18
Dennd1b	Ifrd1	Gm49339
St6galnac5	Faf2	Hr
Trim12c	Aurka	Itgad
Trim30a	Gls2	Deup1
Gm47015	Gm11639	Matk
Gimap6	Lgi2	Ly6k
Abcg3	Hk3	Ly6a
Rpgrip1	Comt	Dtx4
Acsm3	Sidt2	Myo7b
Gm4673	Gtf2e2	Tgfb2
Foxp1	Synj1	C9orf72
Kmt2e	Hdgf	Il18rap
Zfp318	Esam	Runx1
Gm1043	Cd93	Slc35b2
Atxn2l	Kcng2	Gm10033
Klrc1	Zfand4	Ulk4
Tmem8	Ecm1	Serpinb6a
Fyn	Mvk	Adam23
Pnisr	Ap3m1	Ighv1-85
Ino80d	Mcu	Mta3
Igkv15-103	Septin10	Rtel1
Gm47242	Prxl2a	Mybl1
1700109H08Rik	Gpr12	Ighv8-9
Heca	Cped1	Scamp5
Gpr141b	Orm1	Vps11
BC055324	Akt2	Mtmr6
Gm12551	Ncam1	Srrt
Cyp4f18	Rhobtb3	Lsm14a
Gm47924	Nqo1	Alpk1
Eps8l1	Fnip2	Herc2
Pkdcc	Ak6	B4galt2
Evi2b	C1qtnf12	Bbc3
Dab1	Prodh	Smug1
Zfp26	Prom1	Tnfaip8
Bcl11a	Dnajb2	Glp1r
Slc12a6	Sqor	Efr3b
Ly75	Ro60	Cnn2
H2-DMa	Mov10	Cers1
Mag	Shroom4	Camk2d
Ankrd44	Tacc2	Lrrc24
Fyb	Sod1	Zfp618
C1ql2	Ccdc50	Pbdc1
Zbtb37	Syce2	Rims4
Igkv1-135	Tcirg1	B3gnt2
Gbp7	Ctif	Tmem203
Ptp4a2	Dyrk1b	Slc43a2
Rbbp6	Fryl	Rasgrp4
Cdc25a	Hnrnpa2b1	3425401B19Rik
Psmb8	Slc22a4	Ddah2
Arid3b	Adgrg7	Stx3
Myo3b	Sephs2	Septin11
Gm11427	Coro1c	C130074G19Rik
Snhg16	Nt5c3	Scyl1
Nt5e	C1s1	Kdf1
Chchd10	Epha4	Fam118a
BC147527	Adam10	Atl1
Far2	Prkca	Sh3bp2
A530088E08Rik	Mfsd6	Stard4
Aif1	Dram2	Etv5
Cbx7	Scarb1	Tpd52
Dyrk2	Robo4	Spag9
Lypd5	Cebpb	Gucy2g
Fndc9	Ldha	Cd163
Mdn1	Ptch2	Fam221a
Zc3h3	Efna5	Dcaf7
En1	Rasal2	Cd109
Ap1s3	St3gal2	Mia3
Adamts20	Trp53inp2	Atp6v0b
Cep57	Slc25a39	Preb
H2-Aa	Degs1	Rapgef5
Zkscan17	AA986860	Retnla
Pan2	Pgd	Spire2
Tmem150c	Atp6v0a1	Stk10
Zfx	Tmx4	Nlrp1a
Gm16973	Cln6	Wwp2
Nfatc1	Dcaf10	Kctd2
Lrrn4	Pgm2	Pde1b
E330020D12Rik	Prepl	Arpc1b
Rapgef6	Mt1	Adamts9
Kdm3b	Dusp3	Dtx3
Helz2	Mgmt	Esrp2
Cd247	Pomgnt2	Eaf2
Raver1	Metrnl	Klhl30
Foxk1	Pi4k2b	Myb
H2-Eb1	Plcb1	Bsn
Gimap5	Capzb	Prpsap2
Ppp1r21	Tgfbi	Frmd5
Sp140	Capn3	Wfikkn2
Prrc2c	Tlcd1	Nr2f6
Fndc7	Dnm3	Lgmn
Gm21811	Col5a1	Pfkfb2
Ttc14	Ttll1	Raver2
Cecr2	Mrpl49	Sectm1a
Art4	Depdc1b	Kcnj8
Ighv1-80	Cysltr1	Rnf34
Prkd2	Pik3cb	Plekhm3
5430403G16Rik	Fkbp2	Cnot10
Ankrd37	Ctdspl	Trim2
Tnfsf15	Upp1	Vps8
Gm17491	P2rx3	Cspg5
Fnbp4	H1f0	Tmem268
Foxp2	Pik3c2g	Osbpl8
Pla2g4f	Srr	Ptger4
Gimap9	Amer2	Dpp6
Tut4	Capn5	9130008F23Rik
Kcna1	Nrgn	Pomgnt1
AC168977.1	Nrbp2	Prkar1a
St3gal6	Ndufv1	Limk2
9930111J21Rik2	Pum1	Apaf1
Sytl2	Erc2	Dlk1
Kat6a	Phf24	Denn2b
Dock2	Hspb11	Gm12216
Nup153	Tmem132b	Pigv
Klra3	Kifbp	Sdc3
Tasor2	Trpt1	Sox5
H3c14	Pmf1	Dmpk
Parp8	Sorbs1	Mthfr
C2cd3	Lrrc8d	Slc1a1
Mob1a	Slc20a2	Ypel4
Slc1a3	Ifitm2	Zfyve19
Phf6	Ptpre	Abca8b
2810013P06Rik	Depdc1a	Cyp2c65
Cd226	Ccl6	Golm1
Nemp2	Tbc1d10b	Ank2
Rexo1	Clspn	Degs2
Gm50471	Lonrf3	Tspan17
AI480526	Pradc1	Ntn4
Gm20708	Fcor	Lrrc55
BC035044	Srpx2	Tnpo2
Ighv8-8	Fes	Clcn5
Pkig	Med8	Vmn2r95
Flt3l	Xpnpep1	Ccdc125
Fut4	Stard8	Bud31
1810026B05Rik	Ppic	Glis3
Stat1	Ddah1	Ppp1ca
Gtpbp1	Rassf7	Igsf9
Hpd	Insig2	Syp
Trim34a	Cxcl14	Serpina3f
Igkv3-2	Nmnat3	Slc7a8
Tmem163	Inka1	Wrap73
Gigyf1	Nbr1	Cd44
Tyk2	Tmem170b	Fundc2
Adgrg2	Gpr19	Zfp14
Plxnc1	Rbm8a	Rita1
Snx25	Gfi1b	Borcs6
Bcl2a1a	Gca	Rassf10
AI662270	Styx	Iglc1
Rassf2	Fgfr1op2	Tmsb4x
Slc25a37	Ak4	Pknox1
9330175E14Rik	Rbfa	Clec10a
Snrnp48	Oasl2	Irf1
Rfx7	Tbkbp1	Il22ra1
Ddx17	Cops5	Lynx1
Igkv9-123	Cideb	Fam13c
Cd83	Loxl2	Igkv6-32
Il23r	Gabarapl1	Uap1l1
Ccr4	Uck2	Tfe3
Gm21188	Spout1	Sfn
Sfxn1	Ighv1-43	Bloc1s3
Vmn2r97	Ribc1	Itpkc
Crisp3	Tpmt	Csrnp2
Gon4l	Loxl3	Plekha7
Dyrk1a	Cstdc5	Phrf1
Snap91	Tcp11l1	Adra2c
Ctcf	Neurl1a	Pxdn
Setd2	Cpeb4	Clpx
Pllp	Hnrnpab	Spon1
Il16	Creb3l1	Zfp983
Gm47164	Bspry	Kctd14
Ubac2	Drc1	Ppil3
Zfp871	Fer	Crot
Ighv2-6-8	Znrd1as	Rapgef1
Ptpn18	Ccdc68	Ablim1
Trbv16	Gm20604	Zmat3
Zfp456	Igkv4-62	Plgrkt
Klra1	Mical3	Hdac7
Selplg	Lzts2	Mtmr7
Hcst	Map2k3	Synpo2
Gnrh1	Pcyt1b	Phlda3
Samhd1	Yif1b	Cbfb
H2-K1	Ccdc162	Vdac3
Elfn2	Eif2s2	Swsap1
Tyr	Adk	Galnt3
Zscan10	A530064D06Rik	R3hdm2
Igkv4-50	Mocos	Pdlim2
Vamp4	Slc25a24	Pilrb2
A130071D04Rik	Rin2	Vdr
Gm7331	Ero1l	Slc5a6
Trbv2	Pnp	Foxn3
Atad2b	Myo1b	Lman1l
Polm	Itgb6	Fam173a
Tacr1	Timm17a	Mcam
Ikzf2	Bcl2l1	Ubxn1
Gm1965	Marchf8	Acot6
H2-Q10	Ybx3	Gtf2h5
Ccdc148	Trem2	Tmem178
Chst2	C1qtnf5	Iglv2
Gm26781	Ceacam10	Nubp1
Sun2	Igkv1-117	Rasa2
Gm43388	Mfsd14b	Clca3a1
Ikbkb	Tollip	Fmnl3
Cnbd2	Igkv11-125	Gabbr1
Gm26648	Nxpe5	Aqp3
Art2a	Ces2g	Snx10
Igsf11	Ubald2	Sh3bgrl2
Ninl	Gipc1	Leprotl1
Gm36927	Ube2r2	Adck5
Ythdc1	Mast2	Odf2
N4bp2l1	Ube2h	Dnah1
Igkv17-127	Septin5	Wdr59
Gm29100	Hccs	Arfgap3
Tada1	Tm4sf19	Nosip
Gm30054	Tgfb1	Clec4a1
Cfh	Iqgap3	Cyb561d1
Gm43769	Fkbp1b	Cdca4
Slfn2	Nlrp12	Trmt2a
Map3k19	Mmp3	Fbln2
Brwd3	Ccser2	Luc7l3
Lbh	Skap2	Pla2g7
Susd2	Cdca3	Ighv1-75
Gm48348	Oxr1	Igkv6-25
Gm6377	Sptb	Irak4
Sorcs2	Sec22c	Zfp940
Dlgap3	Mib1	Zfand6
9930111J21Rik1	Alox5	Ppip5k1
D130040H23Rik	Cercam	Prss8
Gm11131	Adamts3	Spata5
Rab39	Mpst	Tcf20
Pold1	Gprc5c	Gm5150
Pcdh15	Ano10	Vmn1r1
Usp36	Rnf138	Pex5l
Septin3	Litaf	5330417C22Rik
Hrh1	Blm	Akr1b3
Mppe1	Golim4	Ttc37
Wasf3	Igkv4-51	Rell2
Ppm1d	Aldh9a1	Nin
Ighv1-34	Arhgef39	Ccdc93
Pwwp2a	Cnnm1	Mief1
Gm49599	Ifrd2	Rpl13a
Nsmaf	Agap1	Basp1
Irgc1	Pparg	Ctu2
Mau2	Serinc2	Prrt4
Tmem123	Cmas	Arl4c
Havcr2	Slc6a13	Reep4
Tasor	Tmbim6	Erh
Mbnl1	Adgrl4	Tab2
Birc3	R3hdm1	Lztr1
Hck	Ighv9-1	Kcnab2
Gm15411	Peli2	Cand2
Maml1	Mmrn1	Syn2
Trim25	Ap2m1	Prrg4
Ptprv	Myh10	Mapk7
Hcls1	Cyp39a1	Sec16a
Bcas1	Grb14	S1pr2
Sla	Ap1m1	Gja5
Car15	Engase	Nup210l
Mctp1	Ttc41	Cdh6
Cd40lg	Itgb5	Slc37a1
Gm20735	Cyp4x1	Rgl2
B3gnt8	Lamp2	Sertad3
Zc3h6	Serbp1	Abcc6
Pym1	Cadps2	Mgat4a
Pcdhgb7	Spag17	Slc35a2
Nxpe1-ps	Usp32	Tm4sf20
Dnah9	Abcc5	A930007A09Rik
Nsd3	AA467197	Smco4
Hopx	Igkv4-58	Ubtf
Gm13768	Ndufa6	Fxyd6
Amph	Gnat1	Pdcd2
Gvin1	Vamp3	Tars2
Zfp94	Abcb6	Ctdsp2
Tcof1	Wdr62	Ankrd13d
Rsf1	Kcnn1	Scn4a
Zfp984	Cryz	Vangl2
Kif21b	Mospd1	Nabp2
Rgr	Aspscr1	Ighv8-5
Ccl21a	Heatr5a	Khsrp
Tpsb2	Rffl	Tceal3
Miat	Osbp2	Ppm1f
Rgs10	Tk1	Hdac9
Il5ra	Tst	Snapin
Kifc5b	Prrg2	Tnfrsf11a
Arid1a	Hipk2	Gfra2
Prr5l	Specc1	Parm1
A930004J17Rik	Mtfr1	Sync
H2-K2	Rtn4ip1	Metap1
Gm42927	Zfp661	Arl3
Tbx6	Wbp2	Arsi
Gm43366	Rabl2	Dpysl3
A530001N23Rik	Nucb1	Tmem51
Smap2	Sestd1	Timeless
Kif1a	Garem1	Reep5
2610005L07Rik	Mylk3	Lars
Zfp592	Pcdhb10	Me2
Akap6	Sap30	Ctnnd1
Klrc2	Zfpm1	Slc25a19
Gm45140	Nkd1	Psma5
Prkcq	Gnl3	Cotl1
Pan3	Chid1	Pcolce2
Ncf4	Cdk2	Tacstd2
Cd160	Cemip2	Aldh18a1
Setbp1	Dusp23	Dsn1
Relt	Ripor1	Scn4b
Trim26	Ttc19	Kcnn4
Rps2-ps10	H2ac6	Ptges
Pcdh20	Abca7	Rom1
Cadm4	Adipor1	Xlr3a
Cnot2	Zmpste24	Ppp1r12c
Gm5141	Nos1ap	Tardbp
Setd4	Galnt18	Stoml1
Taok3	Mpp1	Taok2
E130102H24Rik	Eml2	Duox2
Gm36401	Pxn	Spef1
Bcl7a	Nags	Dnm2
Rasgef1b	Ccrl2	Tnk2
Stag2	Fam234a	Sipa1l1
Trim5	Pdzk1ip1	Rce1
Rnf213	Agpat2	Tsen54
Nuak2	Coq10b	Smim40
Klra13-ps	Trip10	Krt18
Zmiz2	Bach1	Gadl1
Adrb2	Tnfsf14	Kri1
Prdm10	Wdsub1	Sftpd
Clk2	Atp7b	Vrk1
Dhx15	Arhgef12	Gcn1
Spata31d1b	0610040J01Rik	Nek6
Pot1a	Commd1	Pdk3
Nxf1	Tor1aip2	Slc35d2
Ighv6-6	Cit	Tmem167b
Pcdh11x	Fbxw4	Arg2
Usp1	Maged2	Knop1
Gm48062	Sprn	Cd300lf
Zfp51	Thra	Zfp287
Ino80	Igfbp4	Ifnar2
Mapk8ip3	Unkl	Zfp777
Tceanc	Ednra	Pla2g15
Gm10505	Cenpp	Elovl1
Creb1	Stard10	Gabrp
Ighv1-59	Tsg101	Slc16a1
Def6	Bicd1	Scrib
Rasa3	Adra2a	Nrf1
Taf8	Blvrb	Cc2d1b
Igkv14-130	Nudt4	Upk1a
Acat3	Ap1s1	Sephs1
Pon1	Ncapd2	Cdc16
Slfn1	Tmem198b	Olfml2a
Tnfsf13b	Ndel1	Prc1
Rps12l1	Plekhg1	Htatip2
Rbl1	Homer2	Alox8
Pcgf5	Tlcd2	Far1
Ighv5-9-1	Gjc1	Lsg1
Gm15478	Eya4	Cask
Ppp3cc	Asph	Sars
Cpsf7	Phf10	Socs6
Fgf14	Gucy1a1	Ntmt1
9230116N13Rik	Ppp2cb	Slc35f6
Gm43597	Cpped1	Icam5
Krtdap	Etf1	Fam110a
Nfkb1	Atp6v0c	Commd5
Kcna6	Hdac5	Sgsm3
Cd47	Dnph1	Lrrc45
Zmynd15	Sox6	Mvp
Gpank1	Carhsp1	Zfp512b
Trim30d	Tom1	Aftph
Rcbtb1	Lrg1	Itm2c
Ecel1	Soga1	Bnip5
Tbx15	Klf10	Selenoi
1810073O08Rik	Ms4a6d	Zmym3
Cdc25b	Sox12	C130026I21Rik
Bpifb5	Hs6st1	Rflnb
Prpf4b	Ica1	Spata48
Ighv2-9-1	Hyal1	Ppfibp1
H2-Q4	Pcmt1	Mak16
Clu	Nudt7	Calcoco1
AC125149.1	Ndrg2	Nxn
Gm42519	Atp8b4	Chmp6
Gm37169	Dcps	Rpap3
C4a	H2bc7	Nfat5
Srsf11	Qk	Gnas
Vpreb1	Pttg1ip	Cdca7l
Fmn2	Tjp2	Paxx
Unc93a	Fam110c	Adgrg6
Gm34680	Cxcl2	Il10
Erap1	Hs6st2	Map4k4
1600020E01Rik	H3c15	Fam83e
Scpep1	Rap2a	Pigz
Cytip	St6galnac6	Sox9
Gm20478	Plpp5	Nhsl1
Alms1-ps1	Tmem41b	Slc9a6
Stk4	Mst1	Padi1
Pde11a	Tusc1	Map1s
S1pr3	Rnasek	Rhoq
Tas1r3	Hyou1	Mfsd9
Tmie	Rab36	Ddx41
Card6	Dyrk3	Fjx1
Gm45540	Ctla2b	Ifi27
Zim1	App	Tspo2
Pisd-ps1	Mylk	Marveld3
Gm37593	Cln3	Rfx1
Stmn2	Hbp1	Rasd2
Gm38220	Steap3	Car4
A430088P11Rik	Lipa	Lrrn2
Atp10d	Nectin2	Rrm2
H2-T24	Txn2	A530032D15Rik
4930417O13Rik	Elf2	Eno2
H2-M2	Arhgef9	Orai3
Klra7	Cep126	Myo15b
Apbb1ip	Ncapg2	Tgfbr2
Pdcd1lg2	Vegfa	Tmem229a
9530052E02Rik	Rbm15b	Ppm1b
Lrp2	Sik3	Tlr2
Gm37261	Lrp4	Cstad
Ccr2	Mansc1	Syt12
Prx	Plcxd3	Rap1gap2
Inpp4a	Uchl5	Smagp
Gm49273	Sem1	Bcl10
AI847159	Shroom1	Obscn
Sema4d	Max	Ptpn21
Slc44a2	Xrcc3	Anks3
Trim7	Gm7694	Hivep1
Whrn	Prim2	Atxn7l3
Elmo1	Acer3	Copg1
Kcnj13	Mkrn1	Tsc2
3110056K07Rik	C3ar1	Myo9b
Igkv8-18	H2aj	Ccdc149
Tmem215	Piezo2	Rgs5
Mirt1	Pfn4	Rnf14
Prrx1	Gps2	Dnajc27
Adamts13	Acbd4	Lats1
Rabep2	Naga	Intu
Jaml	Slain2	Galnt9
Zfp85	Zfhx3	Car9
Bend4	Igkv6-14	Bcam
Celf3	Ccnb2	Spg21
Gm33682	Naf1	Ncoa7
Rapgef4	Fam20a	Smarcad1
Gm10790	Eprs	Dnmt1
Gm14029	Ttll7	Dip2c
Bend5	Ube2o	Coasy
Gm37090	Tmem38b	Raly
Gm15964	Mfap3l	Eci1
Dennd2d	C2cd2l	Dgki
Pcif1	Fam126a	Eif4g3
A430093F15Rik	Entpd3	Ext2
Trbv13-3	Flt4	Plekhj1
Nfkbid	Myh14	Ccn5
Gm37509	Stmn1	Psme4
Pdcd7	Msra	Fzr1
1700003F12Rik	Neil3	Apobr
Aasdh	Gata4	Saysd1
Zfp398	Aldh2	Slc26a6
Ifi30	Adgrf5	Shisa7
Gm28035	Phospho1	Fbxo8
Gria3	Clec12a	Lgals3bp
Il12rb2	Wdr35	Pqlc2
Cdc40	Arl4a	Lsm14b
Rpusd4	Nudt1	Wdyhv1
Drp2	Arhgef17	Wars
Blnk	Sec14l2	Nans
Zdhhc18	Chaf1b	Spats2
Syndig1l	Sntb1	Pilrb1
Raet1e	Fsbp	Crem
St8sia4	Cuedc1	Slc37a2
Malat1	Rspo3	Trpv2
Zkscan1	Morf4l1	Pcbp2
Vwc2	Taf10	Oat
Cpne3	Hist1h2ap	Dglucy
Scai	Tlk1	Eps8l2
Lrrc61	Tead3	Garnl3
Ccdc82	Kif15	B430305J03Rik
BC002059	Naa60	Lamb3
Sirt1	Dcaf6	Vps33b
Ovgp1	Slc4a2	Ccng1
Cd55	Slc7a5	Gm15448
Cd209f	Mapkapk3	Hmga1b
Tent2	Cdhr2	Atp6v0e2
Pstpip2	Ptpru	Mfng
Klb	Gtf3c4	Il1rn
Prg2	Cept1	Sbspon
Gpr65	Rab24	Gramd4
Sipa1	Tbrg4	Vim
Cpsf4	Sh3d19	H6pd
Itpr3	Zmynd11	Ccdc120
4930565N06Rik	Mgst1	Rps21
Gm48478	Nadk2	Eid1
Dennd5b	Uimc1	Mmp28
Gm614	Zfyve21	1700123O20Rik
A730011C13Rik	Crb3	Strada
Zfp729a	Cldn15	Siva1
Slc38a9	Ube2e2	Rnf38
Gm47761	Klhl23	Usp5
Sass6	Mink1	1500011B03Rik
Gm28151	Ephb4	Spryd3
Zfp429	Tfdp2	Fst
Defb6	Nif3l1	Gm49368
Scimp	Cnst	Cxcl10
Gm10358	Itm2b	Ggt1
Pstpip1	Exph5	Sumo3
Trdv5	Sppl2b	Cdipt
Igkv3-9	Ppp1r15a	Tcta
Maf1	Gapdh	Irf3
Ubxn11	Larp1b	Myo5c
Bicra	Bex4	Galt
Mdc1	Bora	Ccdc24
Il18bp	Igfbp2	Tcf23
Cetn4	Cep164	Abi3
Mycl	Katnbl1	Plk2
Itga11	Tmem216	Serpina3i
Bcl2a1b	Iigp1	Zfp644
Smg1	Apoc2	Map3k8
Col6a4	Serpinf1	Slc6a1
BC049352	Selenon	Sh3glb1
A530020G20Rik	Clec16a	Grik3
4933431K14Rik	Nolc1	Kdelr3
Leng8	Scyl2	Lyrm1
Dennd3	9830107B12Rik	Cep63
Rnf114	Apba3	Mcph1
Klrb1b	Wdr26	Znhit2
Carns1	Aldh1a1	Dok1
Xntrpc	Tal1	Hpx
Mllt6	Gnal	Dact2
1700056N10Rik	Tlr5	Arhgef19
Il17rb	Txnl1	Pik3cg
Zfp329	Stk16	Tmem202
Lcn4	Mindy4	Ercc1
Zfp628	Plk4	Myof
Evi2a	Mkx	Dkc1
Cacna1b	Ciao2a	Tbcd
Rdh1	Asgr2	Prkacb
Scara5	Plod3	Fetub
Pcmtd2	Wdr60	Plod2
Plekho1	Fkbpl	Dus1l
Baiap2l2	Ndc1	Ddias
Csmd1	Ablim2	Fam129a
Ccr3	Lrrc59	Lrrfip1
Syt1	Atp1b2	Atad5
Tnfrsf18	Ckap2l	Tti2
Gga3	Asb2	Arrdc1
Gpr83	Narf	Batf2
Cbl	Lin7a	Rcan3
Gm5547	Hnrnph1	Trmt9b
Elf4	Ppp1r2	Slc8b1
Rps10-ps2	Lamc1	Nbeal2
Cep85	Fhdc1	Mark2
Agbl1	Zfp143	Igkv6-23
Pacs1	Capn2	Sh3kbp1
Ccr8	5730507C01Rik	Inpp4b
Oasl1	Ndufv3	Prpf8
Madd	Tbc1d24	Cdk14
Gm6566	Hmgb2	Lpcat4
Son	Anln	Echdc2
St8sia6	Mrgpra2b	Tdrkh
Gm45684	Abtb1	Cct7
Zxdb	Kif11	Gm11214
Susd1	Grhl3	Pnkd
Lrrc75a	Armcx6	AI413582
Dedd2	H4c6	Ankrd16
Zscan12	Rdh10	Alkbh8
Nrm	Stk3	Hdac6
Sin3a	Alad	Eda2r
Itih4	Dnajb4	Postn
Samd3	Gpsm2	Ighv5-15
Unc93b1	Twf1	Hrh2
Gm5421	Chrd	Ccdc22
Sdhaf1	Gsto1	Agap3
Foxred2	Tacc3	Tada2a
Gm10553	Depp1	Bmi1
Papolg	Vkorc1l1	Abcc1
Chd1l	Gm27029	Gltp
Rbm38	S100a16	Rxrg
Ces2c	Aqp1	Asic2
1300017J02Rik	Aqp11	Ano6
Gm44087	Slc36a4	Ints3
Zcchc4	Acvr2b	Cmtm3
Lcp2	Car8	Clcn3
Edaradd	Ctbp1	Fbxw2
Kmt2b	Aldh16a1	Rgs19
2610035D17Rik	Map3k15	Wdfy1
Nktr	H3c11	Gmppa
Zcwpw1	Pus1	Bace2
Prrt1	Cops3	Eapp
Gngt2	Tek	Pik3ca
Ppfia4	Cdk18	Aebp2
Trbv14	Tnfrsf1a	Chmp1a
Vtn	Camk2b	Pklr
Gm47447	Csnk1a1	Elfn1
2310001H17Rik	Rab11fip1	Ngfr
Clk1	Ift22	Zmat4
Igkv4-59	Mtfr2	Ina
Gm13710	Fam214b	Dennd5a
Gins3	Gyg	Cyb561d2
Poli	Itsn1	Smc2
Igkv1-133	2310030G06Rik	Cdhr3
Gm45606	Olfm1	Gstp2
Ighv1-78	Rpl38	Tead1
Olfr509	Tomm6	Entpd2
Ighv1-47	Traf7	Gstm4
Gm49284	Gale	Comp
Rhobtb2	Tnc	Ctps
Sgpp1	Bdh2	Tmem263
Atp11b	Zfp568	Ms4a2
Zfp263	Cyfip1	Tor4a
Gm43071	Ranbp1	Spatc1
Pdia4	Znrd2	Stxbp2
Pdk1	Zfpm2	Wbp1
Dhx57	Braf	Zfp658
Erbb4	Lgr5	Wfdc18
Rcsd1	Mcfd2	Artn
Ssh2	Ampd3	Sapcd1
Pigl	Nt5c2	Pi4k2a
Zfp869	Kpna2	Pdcd1
Nfatc3	Htra4	Vps50
Ugcg	Sphk2	Leng9
Fam111a	Smim6	Spag5
Zfp39	Ncbp2	Rec8
Igkv1-110	Urod	Cdh26
Elk4	Bcar3	Slc33a1
Gm42549	9330182L06Rik	Usp54
Zc3hav1	Cd300ld	Trit1
Marchf1	Nudcd2	Faap20
Cracr2a	Bco1	Tsc22d4
0610030E20Rik	Ncoa4	Rassf1
Prokr1	Csad	Podnl1
Hcn1	Slc30a4	Szt2
Gm20463	Nwd2	Sv2c
Lmbr1l	Fech	Zmynd12
Dclre1c	Ap2a2	Tmem177
Gm47640	Ppp1r15b	Hsd11b2
Sema4b	Tceal9	Ighv14-2
Psg22	Pole	Fcsk
C1ra	Vopp1	Ints6l
Gm45061	Camkk2	Notch3
Mpz	Phlpp2	Tent5b
Zfp874b	Fancm	Flvcr1
2510017J16Rik	Vdac1	Tpra1
Mypopos	Cdca8	Nr2f2
Usp18	Calu	Slc8a3
Kdm4c	Alkbh3	Zfp646
Tent4b	Xiap	Sapcd2
Gm31166	Cers6	Pafah1b2
Plag1	H2bc6	Mre11a
Erv3	Enpp3	Lcor
Phf2	Abat	Smarcb1
Gm3696	Sh2b1	Tmem181a
Exosc6	Stil	Lrch4
Ice1	Oplah	Il34
Zbp1	Gstm5	Rac3
Cyp1a1	Ube2q2	Lrp10
Csk	E2f8	Nipa2
Sostdc1	Cd36	Dynll1
Supt20	Dcaf8	Gpr160
Sorcs1	Atp5g1	Rnmt
Cadps	Tmem184a	Cyhr1
Akap8	Prdx2	Foxj1
Trbv5	Ier3	Cfl1
Gm45552	Dnajb6	Cenpx
Gm47106	Tcf7l1	Mtmr3
Insm1	Rangrf	Pycr1
Gzmb	Abhd11	Akr1b8
Rbm33	Robo3	Cox18
Naip6	Dut	Sae1
Trbv12-1	Tesmin	Ptprm
Ramp3	Zmiz1	Polg
Zfp945	1810037I17Rik	Knl1
Clec2g	Thsd4	Pilra
Hnrnpul1	Fmo5	Lilra6
Gm37266	Zfp87	Ptgs1
Igflr1	Ncf2	1110051M20Rik
Vmn2r96	Tuba1c	Cox14
Parp6	Ttll11	Atp6v1b2
Particl	Chp1	Flrt2
Tagap	Gpc6	Jakmip3
Olfr338	Cxcr1	Ms4a4a
Gm43059	Smtn	Med10
Sntg1	Cdk1	Fstl3
Tspan10	Ppfia1	Oxct2a
Mecp2	Mki67	Map11
Srcap	Cenpl	Peg12
Gm20662	Pld6	Cyp4f13
Trbv31	Smim5	Rundc3b
Zfp764	Gins1	Kdm2a
Parp1	Bak1	Hbegf
Mrgprb1	Tial1	Cdk5rap3
Mtcp1	Robo2	Epn3
Trbv15	Wdr12	Trim35
Gm44751	Rps14	Cc2d1a
Zfp773	Rab6a	Tes
Jmjd1c	Dmd	Ighv9-4
Man2a1	Apex2	Meis2
Ly6a2	Tut7	Pip5k1a
Clec9a	Tnip3	Apobec1
Gm49492	Crkl	Bmp8a
Cblb	Scrg1	Enpp4
Ttc7	Rnase10	Igkv4-53
Tbl1xr1	Pip5k1b	Wdr83
2610528A11Rik	Myl4	Hepacam
Gm13012	Dnal4	Ffar4
Dgka	Hdlbp	Zer1
Chrnb4	Pkdrej	Ccl24
Olfr639	Dlx4	Telo2
1500004A13Rik	Pcdhb6	Ttn
Ighv5-16	Ddx39b	Abhd4
Rabgap1l	Kcna4	Syngr1
D430040D24Rik	Tns2	Scyl3
Clp1	Fis1	Serpinh1
Krt36	Apex1	Ptcd1
BC106179	Gm1604b	Marchf9
Twistnb	Dgkb	Olfr365
Gm10369	Gjb3	Zfp62
Ighv1-15	A930009A15Rik	Klhdc7a
Zfp335	Foxd4	Noxa1
Crebzf	Slc35a3	Aldoc
Olfr99	Ncln	Apol11b
Nfx1	Espn	Aif1l
Ripply3	Rad51c	Qrsl1
Gprasp1	Aurkaip1	Urah
Gm43189	Ube2v1	Myom3
Kcnq1ot1	Bbip1	Cd63
Kctd12	Ovol3	Cdc20
C1rb	Ccdc150	Gbgt1
Psmb9	Ppp1r35	Cacng7
Gm36723	Sh3rf2	Gckr
Slitrk4	Pltp	Trps1
Ccdc69	Stag3	Clca3a2
Wdr82	Lgi3	Mis12
Cmtm7	Zkscan16	Gm17949
B230206H07Rik	Cklf	Col5a2
Gse1	Arid3a	Syt11
Atrx	Ear6	Ttll3
Gm42783	Ttc21a	Cab39l
Ighv1-66	Smim11	Ankle1
Elf1	Mybl2	Lpar5
Brd8	Hsf2bp	Gm49391
Gm43606	Plekhs1	Zdhhc16
Dock11	Ighv3-3	Hebp2
Phf1	Cox6b2	Acvr1b
Msl1	Aph1c	Gnb1
B4galnt1	Klra17	Lrrc27
Tmpo		Tspan8
Zscan29		Insl3
Pigm		Cdpf1
Il1a		Tspan5
Adam19		Tbc1d7
Gm42688		Slc25a23
Zbtb39		Rps25
Ly6i		P4ha3
Gm34280		Mrpl20
Cd300c		Atp2a1
Awat1		mt-Nd6
Lgals12		Polr3h
Ep400		Tanc2
Dntt		Atp6v1c2
Cdk5rap2		Zbtb42
Vmn2r20		Sppl2a
Med14		Nt5m
Abhd8		Snapc2
Gm34589		Rpusd3
Tlr12		Daxx
Zup1		Tmem269
Btnl2		Carm1
Lypd2		Pirb
I830077J02Rik		Rbm42
Luc7l2		Cd200r1
Gm5069		Pcdhga7
Plcxd2		Cep290
Pclaf		Ap1g2
Gm2115		Ppp2r1a
C920009B18Rik		Rpl31
Rad21		Dlg1
Dapp1		Marchf4
Nccrp1		Cdc14b
Gm47694		Sparc
Lrrn3		2510002D24Rik
Bid		Them5
Gm31374		Prkcd
Samd9l		Limk1
AI838599		Gigyf2
Gm21985		Ahnak
Gm16754		Zfp688
Krba1		Tmem35a
Atg16l2		Muc2
4933427D14Rik		Tmem63a
Slc17a8		Klc3
5430416N02Rik		Ern1
Gm28875		Cdh4
Gm15503		Igkv10-94
Epc1		Psmc3ip
Akap5		Cltb
Ttll4		Lamc3
Dmrta1		E130308A19Rik
Gm49971		Ralgds
Gm44175		B3gntl1
Igkv6-13		Ntng2
Zbtb6		Gm13889
Slc16a2		Exoc4
4933431C10Rik		Pde7a
Nlrp1c-ps		Lamc2
9630028I04Rik		Prdm16
Alkbh4		Ano1
Zfp507		Sco1
Clnk		Ankrd55
Slc12a7		Dhdds
Gm43684		Rsad1
Ncf1		Zdhhc2
Rps6-ps4		Xirp1
Vrk2		Slc25a36
Dnajc9		Olfr56
Gm45235		Adgrl2
Espl1		Pfkp
Cd33		Ptrh1
Ankrd26		Kmt5c
Sp3		Srpk1
Gm49322		A2m
Wdr37		Slc35f2
BB365896		Zbtb45
Igkv2-109		Slc25a11
Phf2os1		Dstyk
Rbm25		Cers5
Cadm2		Ap4m1
Ighv1-69		Dpep2
Map3k14		Nod1
Lmnb1		Dnm1
Zfp850		Kcnh2
Ntn5		Rad51d
Fam107b		Impdh1
Med13		Sh3bp1
Klri2		Mbnl3
Gm43196		Nat8f3
AC123856.1		Map4
Fcna		Fgf11
Brd4		Ptgis
Ighv1-56		Slc35b3
Patl1		Gm10184
Zfp472		Zbtb49
Psapl1		Tspan3
Acss1		Itga9
D130058E05Rik		Gm43218
Aebp1		Anks6
Gm10676		Unc13b
Naip5		Gpr153
Gm16239		Evl
Gm16794		Ccar2
Gm11400		Snx5
Snx22		Cacna2d1
Gbp5		Atg101
Zfp280c		Srd5a3
Spata13
Mtmr1
Gm10101
Chd1
A430110L20Rik
9930017N22Rik
Ift80
Vcpip1
Gm3365
AL831766.1
Gm28053
Esco1
Rgs8
