# Supplementary material for: Multi-Omics Profiling Identifies Biomarker Candidates and Pathogenic Divergence Between Post-Transplant Diabetes Mellitus and Type 2 Diabetes
Source: Research Square preprint supplement (doi:10.21203/rs.3.rs-7682951/v1), 2025-10-10
Supplement: Supplementary file 3 [file be0502357848fc6adf3bac57.xlsx]

## Sheet: Sheet1
Only Fat	Only Pancreas	Only Liver	Fat AND Pancreas NOT Liver	Fat AND Liver NOT Pancreas	Pancreas AND Liver NOT Fat	Fat AND Pancreas AND Liver
Pdlim7	Nfia	Rnf138	Fgf13	Rhoc	Pum2	Serpinh1
G6pdx	Mical3	Sspn	Itgb5	Fhod3	Hnrnph2	Slc38a3
Pate6	Sdf4	Gtf2ird1	Folh1	Bicd2	Arhgap17	Prepl
Oxtr	Setx	Eif4a2	Ctnnb1	Tmem132a	Rbm47	Mocs2
Qsox1	Wdr45	Extl2	Mettl7b	Gamt	Esco1	Plekha7
Tstd3	Acot8	Uhmk1	Aen	Prdx6	Nup210
Hr	Gnb2	Adgrl3	Scn8a	Egr2	Shroom3
Tax1bp3	Vipr1	Mbnl2	Gmppa	Ndrg2	Nsd2
Slc1a4	Mta1	Pan3	Pmepa1	Fos	Rrm2b
Slc6a13	Slc26a1	Ift80	Mtarc1	Rcor2	Riox2
Laptm4b	Map3k19	Vamp4	Elp3	Apex1	Rapgef6
Ccn2	Ap4b1	Piezo2	Ttc38	Spc25	Prps2
Cavin3	Arf5	Bcl6b	Emc9	Ywhag	Parp9
BB218582	Dnajb2	Kiz	Fosb	Ube2w	Fndc4
Paqr9	Tinagl1	Mtus1	Hsph1	Ldhb	Srpk1
Lmna	Camk2b	Pcbd2	Esrrb	Plod2	Zfp72
Map3k7cl	Jaml	Cyth1	Chmp2a	Rnasek	Paqr3
Gm20634	Dgka	Bahcc1	Fam98a	Trappc4	Kcnn1
Dnajb13	Itga7	Ankrd17	Adgrl2	Tcaf1	Mlxipl
Cd320	Ifi208	Tent4a	Tmprss6	Cela1	Fam120b
Dgat2	Art2b	Slc12a6	Ifi27	Metrn	Klhl3
Hspa2	Cfb	Smc2	Itgad	Egr1	Ccdc93
Adamts15	Trbc2	Nampt	Cdkl2	Pfkfb3	Brwd1
Gpc4	Cyp3a41b	Ndst2	Tmem45b	Ap3m1	Ablim1
Gsdme	Uspl1	Usp8	Kyat1	Trib1	Uqcc1
Crip2	Csnk1g1	Spry4	Gpam	Nedd4l	Senp5
Eif1a	Apol7e	Brox	Tdrp	Nsfl1c	Irf3
Kcnj14	Itgb7	Kcnk5	Gtf2i	Lpin3	Cyp2a5
Plin3	Il27ra	Hmg20b	Cav2	Ap1s1	Ccm2
H2ac18	Trbc1	Nmrk1	Ugt1a6b	Anxa4	Trib2
Htra1	Gtf2ird2	Arhgap21	Plin4	Fgf1	R3hdm2
Col15a1	Ms4a4b	Dpys	Pla2g6	Ube2k	Cadm1
Atp6v0e2	Helz2	Kif3c	Ube2e2	Cops8	Acy1
Eef1akmt1	Atm	Hnrnpf	Etfrf1	Ier2	Tomm70a
Morf4l2	Zfp318	Cnst	Vldlr	Llph	Rasa1
Prr32	Sesn3	Pbrm1	Aamdc	Lasp1	Zfp869
Trabd2b	Ndufs5	Mical1	Abat	Wee1	Zfp281
Gys2	Tmie	Hnrnpa3	Mical2	Trp53inp2	Fxyd1
Gm12426	Ttc23	Gadd45gip1	Mpv17	Emc2	Cdc14b
Otop1	Slc4a4	Eif4enif1	Cth	Ccser2	Gprin3
H2ac19	Pglyrp2	Ecpas	Fam234a	Spry1	Bcl9l
Gsta3	Serpini1	Tcf4	Parp3	Stim2	Slfn8
Palld	Tcf7	Dnajb5	Ctsl	H2bc6	Irf9
Ccdc9b	Trim14	Aste1	Chid1	Cyth2	Kctd20
Col16a1	Ifi206	Gpsm1	C1qtnf9	Srp54c	Kat6a
Has1	Olfml1	mt-Nd1	Sec22a	Txnl1	Pde4c
Mmp19	Sema4g	Anp32e	Tpmt	1810055G02Rik	Uck1
Mogat2	Als2cl	Smc5	Thnsl2	Yif1a	Spg20
Srpx2	Ifi213	Tank		Egflam	Sap18
Bsg	Slc28a2b	Ank1		4833439L19Rik	Epc1
Atf3	Igkv4-55	Cep44		Angptl3	Dst
Fstl3	Lrrc14	Sucla2		Usp46	Csde1
Psmd8	Kat7	Nrros		Rab7b	Ess2
Acta2	Nab1	Arid4b		Lrpap1	Phc3
Disp2	Cd3d	Zfp658		Akr1a1	Cnn3
Gm12236	Rcbtb1	Acot3		Plod3	Rala
2600006K01Rik	Pcx	Nr1i3		Sar1a	Mia2
Fbxo4	Fiz1	Hist1h2br		Cfap36	Upp2
Podxl2	Syncrip	Slc4a8		Pacsin2	Gstt1
H1f10	Grsf1	Gm49366		Gcnt2	Rbm39
Dynll2	Zfp831	Dab2		Frem1	Atf7
Gm9696	Entpd5	Zfp1		Arl1	Dnm2
Gm5138	Scn3a	Tppp		Slc25a19	Inpp4b
Pgd	Gramd1a	Ptprf		Kpna3	Pdk1
Nudt18	Tbck	Apc		D5Ertd579e	Kmt5b
Epdr1	Tnfsf8	Irf5		Ubap2	Immp2l
Mrps6	Adam17	Fam214a		Zdhhc6	Cd22
Ttc39c	Znrf2	Zfp131		Chn1	Prdm2
Kcnh2	Ffar1	Resf1		Nrg4	Trim3
Cercam	Nat8f4	Whrn		Klhl22	Cep170b
Dpep2	Pdp1	Phf3		App	Ung
Cnnm2	Il17rb	Tnpo1		Lamb3	Mrpl36
Hspd1-ps4	Mapk12	Socs2		Dnaja1	Usp40
Igfals	Rasal1	Smg7		Grip2	Cers2
Tpi1	Faah	Abcb1a		Snx10	Ccdc191
Nrarp	Gan	Zfp36		Ccdc141	Sbk1
Ppp1r3c	Cnot6l	Eaf2		Gab1	Mid1ip1
Ncs1	Patj	Prc1		Abhd11	Slc29a1
Kng2	Cd8b1	Ago1			Gm19684
Tmem120a	Trbv4	Scaf4			Ankhd1
Fam110c	Slco1b2	Dctn6			Sh2b3
Gm48132	Kynu	Ythdc1			Fam102a
Timp4	Nbeal1	Rhobtb1			Mpc1
Gm9951	Inca1	Wdr48			Igsf10
Actr3b	Tacc2	Asb3			Ptbp3
Crisp2	Dicer1	Dnajc13			Serpina3m
Snta1	Zgpat	Plekha8			Psmb9
Plppr4	Trat1	Atf2			Zmat1
Rab3d	Ptpn4	Gstt3			Stat1
Tuba1a	Fpgt	Coro2a			Papss2
1110008P14Rik	Cd96	Emsy			Helz
Msrb1	Rtkn	Ergic2			Hnmt
Tubb6	Pi4k2a	Arfrp1			Lgals8
Creb3l2	Prkd2	Adam8			Vrk3
Il6	Tspoap1	Akap12			Klhl18
Ephb2	Zscan26	Zfp644			Lef1
Hspb8	2310061I04Rik	Tirap			Shld2
Fam129b	Prkcz	Ttll5			Slc46a3
Aars	Pgbd1	Nfya			Rubcn
Lep	Sh3glb2	Cyp2c67			Zfp24
Lztr1	Klhl24	Tmem38b			Synj2
1700030N03Rik	Gbp5	Slc15a4			Dpp4
H3c15	Tfpi	Zfp40			Gopc
Pkp2	Saysd1	Slc50a1			Fkbp3
Tubg1	Sra1	Rab28			Echdc1
Lcmt1	Sike1	Nup205			Alb
Gm15519	Asb13	Otud4			Gtf2a1
Tekt1	St6gal1	Fgfr1op2			Mettl16
Cyb5r1	Apol7c	Zhx1			Elk4
Dipk1b	Pdia3	Phf19			Cept1
H4c8	Shisa5	Thoc2l			Maf1
Atp6v1e1	AI182371	Il15ra			Zcwpw1
Cdc42ep4	Thada	4430402I18Rik			Nsd1
Wfs1	Gpr174	Ppil4			Celf2
Sycp3	Pon3	Rims3			Dbp
Myo1d	Ccnd3	Mafb			Traf5
Dbn1	Mdp1	Gm3435			Proc
Adra1a	Ndufa4	A930033H14Rik			Mrps35
Tnfrsf12a	Josd2	Nrep			Rnf167
Gm30173	Gimap5	Pip4p1			Letm2
Gm26726	Pter	Iqsec2			Scaf8
Mecr	Zkscan7	Nipa2			Tat
Chst13	Bcl11b	Prom1			Foxo1
Dipk2a	H2-Q1	Mcoln1			Map2k6
S100a11	Krr1	Nucb1			Prss30
H2bc11	Mup18	Ccne2			Jakmip1
Gm4430	Gm28053	Orai3			Zfp759
Gm7887	Ephx2	Trhde			Retreg1
Ptp4a1	Crlf3	Zfp276			Rfesd
Fam217b	Ppp1r26	Stk38			Rab11fip2
Galnt2	H2-T22	Hnrnpd			Ddo
Nutf2	BC147527	N4bp2l1			Ikbkg
P4hb	Hsf1	Atg3			Glcci1
Tril	Pon1	Epb41			Rorc
Fkbp1a	Tert	Rab39b			Pde8b
Mvp	Lypd6b	Cobl			Ube3a
Gm47031	Adcy7	Apold1			Fam13b
Gm11627	Wdr89	Chn2			Epb41l3
Unc13b	H2-Q7	Tpp2			Gpr153
Sdsl	Rps15a	Zmiz1			Setdb1
Bdnf	Rc3h2	Rbis			Ppargc1b
Fam83a	Aebp2	Ogfod1			Zfp27
Phlda3	Btg1	Ndufs8			Zfp943
Gm26920	Recql5	mt-Cytb			2510002D24Rik
Higd1a	Ncf2	3110001I22Rik			Ubp1
Hapln4	Cfap74	Samd4b			Ttc19
Comt	Spice1	Jph2			Tmtc4
Ift20	Adrb3	Smarca2			Ap3m2
Nkiras1	Tubgcp4	Dio1			Kdm4b
Ube2r2	St8sia1	Bdp1			Kcnk10
Tubb4b	Xylt2	Gtf3c6			Impg2
Grtp1	Macf1	Calr			Wdcp
Cnih1	Cpm	Garnl3			Eml4
Mxra8	Hdhd5	Tmem131l			Zfp65
Mgat4b	Mapk11	Papola			Hexdc
Anxa1	Klf8	Asb4			Itsn2
Gmppb	Fgd4	Slc22a30			Ptgr2
Gm50431	Arl4c	Kmt2d			Zfp467
Cidec	Phf1	Endou			Rnpepl1
Insyn1	Sin3b	Hbp1			Edc4
Shroom4	Ifi47	Sepsecs			Fads1
Dnmt3l	C6	Rab9			Meaf6
Unc80	Prxl2c	Osbpl5			Hpd
Spcs1	Ubl4a	Arl15			Zfp369
Jpt2	Myo18a	Ect2			Mga
Gm13703	Tceanc2	Trappc12			Cnot4
Tfpi2	Slc16a2	Atxn7l1			Rbm46
Pafah2	Il17rc	Gbe1			Gne
Cryz	Nprl3	Il1a			Paics
H2bc4	AW146154	Fads2			Zfp715
Tjp2	Lamb1	Nudt3			Deup1
Mylk	Mthfsd	Lipg			Slc24a5
Pgam1	Sidt1	Pagr1a			Wdr63
Cyb561d2	Ttr	Actr6
Lgals3	Arhgef10l	Flt1
Ttll1	Rufy2	Pcolce
Optc	Klkb1	Kdf1
Tm9sf4	Slc38a7	Ebf1
Tph2	Sp100	Ldb2
Ucp1	Cldnd1	A630001G21Rik
Tfr2	Ehmt2	Zfp266
Ppp2r1a	Bdh1	Grpel2
Arvcf	Gpr137c	Igkv8-16
Mpdu1	Apob	Zfp788
Mir6236	Gfra1	Zfp384
Pappa2	Zfp112	D230025D16Rik
Rnd2	Tgtp2	Gnpda1
Prkag3	4932438A13Rik	Sltm
Psmc2	Ttpal	Col23a1
Smoc1	Apoh	Max
Hebp1	Adar	Plce1
Syn2	Mycl	Plac8
Peg10	Uros	Lin7a
Cmc2	Aven	Eif4b
Cttn	Chd3	Cd8a
Snap47	Prss36	B3gnt2
Rnf6	Tmco4	Sp3
Rbpms	Bcar3	Trmt2a
Gm48416	Slc10a1	Rbm6
Rbpms2	Zfp839	Srrt
Micall2	Kcnc3	Mapk8ip3
Gpr50	Mettl23	Thrsp
Gm43069	Mrpl24	Ttc3
Maged1	Ikbkb	Arhgap6
Ppp1r3d	Steap2	mt-Atp6
Psmd6	Plxnb1	Ar
Usp5	Kcnc1	Maskbp3
Yipf5	Aspa	Chtf18
Myl9	Snapc3	Fbxw2
Gm12248	Bicral	Grhpr
Gm32443	Yae1d1	Tgfbr3l
Hk2	Dapl1	Tspan13
Dhcr24	Fam13a	Pfdn2
Khdrbs3	Cgn	Pdzrn3
P4ha2	Gimap9	Per2
Ipo4	Rbp4	Fam126b
Dll1	Nrxn1	Osbpl1a
Sqstm1	Rab11fip3	Arid5b
BC031181	Tasor2	4931406P16Rik
Gpr27	Mid1	Ivns1abp
Dcun1d4	Nadsyn1	Emid1
Tmem109	Rabepk	Acot13
Map6	Fgb	Mllt10
Grid1	Tmem176b	Babam2
Hmgcs1	Cep68	Sos2
Myl12a	Fgg	Bod1l
Calr4	Gm5141	Zc3h13
Adrm1	Cyp3a25	Spata5
Gm43951	AC147806.2	Mef2d
Ccl2	Fetub	Atl2
Psmb5	Igkv5-39	Morc3
Ctsd	Npr3	Crbn
Lrrc59	Trav14-2	Tusc3
Gm48415	Fam78a	Per3
Blzf1	Cps1	Hlf
Gm13709	Armc8	Msh6
Cbs	Apol9a	Rbm12b2
Eif4a1	Cd247	Sf3a2
Dpysl3	Ppp1r11	Zfp750
Hspb1	Il18r1	Hivep2
Fam20a	Exd2	Smim10l1
Taf11	Il5ra	Rida
Boc	Adora1	Cct3
Slc31a1	Izumo4	Vps50
Ephb1	Slfn5	Shank3
Myl6b	Cd3e	Rbm15
Creb3	Ints4	Fastkd5
Ptgs2	Cyp2u1	Rce1
Srxn1	Apoa2	Cse1l
Gm10293	Hltf	Akr1c20
Mmd2	Stra6l	Casp1
Slc16a12	Cyp7a1	B230217C12Rik
Ina	Dtx3l	Pnpla8
Ocstamp	Zfp523	Tnks1bp1
Zcchc17	Igkv4-78	Smyd1
Myl4	Mia3	Tcf12
Tenm4	D630045J12Rik	Haghl
Epha4	Brcc3	Lyst
Fam160a1	Invs	Cfdp1
Tmem98	Bmp10	Afmid
Tmem63b	Slc1a2	Rbm48
Map3k20	Tada2b	Vipas39
Slc6a8	Hsh2d	Nav3
Akr1cl	Hdac10	Tmpo
Timp1	Ptpn6	Plbd2
Atp6v0e	Map4k2	Ttll8
Mpv17l2	Ift46	Mrtfb
Actr1b	Cdo1	Prickle3
Hpdl	Icam2	Top1
Thbs1	Trbv15	Pfkp
Gpx4	Slc12a7	Nkapd1
Blvra	Mat1a	Gm12216
Ebpl	Aak1	Rexo1
Nudt4	Ifi203	Lztfl1
Ier3	Llgl2	Ppp1r18
Kcne2	Gga2	Brd1
Taf13	Ahsg	Zfp236
Coq7	Eif2b4	Cd82
Tnfaip6	Ube2v2	B9d2
Gm20521	Mpst	Cdc73
Snx7	Slc9a8	Zbtb18
Serpinb9b	Mypop	Wdyhv1
Ldah	Nxpe3	Itgam
Ier5l	Ciita	Mcm5
Gm45902	Trim21	Hmgn2
Tbcb	Atg4b	Ankrd12
Atox1	Gpr141b	4930523C07Rik
Wdr18	Zap70	Gm826
Itgb1bp2	Pced1b	Shb
Trappc3	Dffa	Trpv2
Syt12	Trav16	Chd9
Ldha	Cdk5rap1	Septin9
Dclk3	Nod2	Fam129c
Hydin	Lrig1	Npm1
Pgk1	Klhdc1	Sri
Ret	Akr1c6	Sult1a1
Atp6v1a	Exoc3	Ghr
Pdap1	Wdr47	C2cd2
Srp19	Derl2	Mecp2
Gcsh	Zfp113	Ccdc57
Gtf2h5	Thy1	Eif3j1
Fads3	Zbtb37	Stk35
Atxn10	Capn15	Syde2
Wfdc12	Slc4a2	Cep135
Nnmt	Mterf1b	Kif2a
Mfsd5	Dyrk4	Chp1
Cpeb2	Pogk	Zdhhc2
Dhx32	Pnpla6	Il2rb
Eif2b3	Plk4	Unc93b1
Unc79	Prkag2	Dynlt3
Wars	Uroc1	Smarcd2
Ryr2	Tstd1	Hand2
Nudt19	Ppil6	Osbpl7
Mgp	Pik3c2a	Cyp2c40
Abcb6	Magi1	Abhd18
Dad1	Sptan1	Zfp607a
Tgm2	Lrrc56	Tfdp2
Sorbs2	Dixdc1	Bcl6
Gss	Rpl38	Rbm27
Rnase1	Ppp1r3f	Trem1
Lbp	Rbm26	Pum3
Sult4a1	Mtap	Nadk
Rras	Adgrf5	Wdhd1
Zc2hc1a	Nrn1	Acot11
Dcxr	Esyt2	Agtpbp1
Hspb6	Ifi35	Itgav
Dcakd	Bhmt2	Exoc1
Emc4	Ces2a	Gm14403
Tagln	Gm50237	Pcf11
Gm48371	Ints6	Zbtb41
Cops3	Uprt	Mpp1
Polr3h	Dhrs7	Ankrd13c
Cdc42ep1	Tbc1d10c	Snx27
Acsl1	Ints1	Spty2d1
Gstm2	Snx24	Pcbp2
Tbl2	Zfp60	Cd5
Itpk1	Tor3a	Cep164
Psma1	Kctd21	Tlcd2
Slc16a10	Lims1	Msto1
Pcbd1	Pkd1	Riok2
0610009B22Rik	Zfp707	Zup1
Rps27l	Asgr2	Naa60
Map2k3	Nsg2	4632433K11Rik
Tmem205	Bcl11a	Gin1
Colca2	Fam169b	Gata4
E2f3	Aqr	Pdgfd
Oxct1	Gm45871	Zcchc7
Nexn	Masp2	Pcm1
Plaat1	Fam107b	Wapl
Fhit	Ube4a	Ngef
Gm17501	Ganab	Entpd8
Ptprs	Harbi1	Taok3
Sipa1l1	Tet2	Rreb1
Dll4	Nuak1	Klhl12
Lrrc39	Traf3ip3	Mapkapk5
Mlec	Caln1	Zfp458
Hmbs	Cyp2e1	Ppcs
Pdrg1	Shprh	Phkb
Gm28539	Tyw1	Zfp595
Cdkl4	Dguok	Adam22
Ddit3	Serpina1a	Ankrd33b
Timm23	Rinl	Zfp354b
Fam89b	Caprin1	Myc
Vgll3	Prpsap2	2410002F23Rik
Gja1	Slc25a16	Ube2h
Pebp1	Dennd6a	Pmm2
Rab3a	Ccr4	Maco1
Tmprss11a	Stk10	Lrp4
Ankrd40	Nsmf	Homer2
Hspa14	Gm3448	Rbbp6
Rexo2	Nxt1	Pmp22
Zmat3	Hsd17b13	Sox6
Lpgat1	Apol7a	Parvg
Mtln	Neurl4	Shisal1
H1f4	Wnk2	Zeb1
Gm3194	Krcc1	Nr1h5
Mrpl54	Gimap3	Phldb2
C2cd2l	Bin1	Mgme1
Chmp1a	Ddx58	BC005624
Socs3	Gm4070	Tut4
Cyb5a	Ralgps2	Cmbl
Cntn2	C4bp	Uox
Srp54a	Ptms	Ubr3
Anxa6	Pigv	Trbv2
Gm30557	Aasdh	Hoxa5
Lta4h	Plekha5	Ckap5
Myl6	Clta	Ccnt2
Tmed3	Top3b	Pde4d
Pef1	Rpap2	Zzz3
Cald1	Trmt10b	P2rx7
P4ha3	Ugt2b35	Ces3b
Agfg2	Tubgcp6	Upf1
Cyb5r3	Rpl9	mt-Co3
Gm47221	Ctsc	Lactb2
Chpf	Trp53i13	Usf3
P2ry1	Trim12a	Tasor
Maoa	Ap5m1	Mcph1
Adamts1	Utrn	Tlcd1
Capns1	Tagap	Sgk1
Ap2s1	Tecpr1	Zscan29
Gm36816	Mapk8	Adcy3
Ddx56	Phykpl	Dusp22
Mrpl16	Numa1	Susd2
Cux2	Tha1	Adgrg2
Wdr83os	Nmi	Trmt2b
2310014F06Rik	Hgfac	Azi2
Psmb2	Mmaa	Gpr68
Syp	Bicdl1	Uba6
Ltbp3	Pfkfb1	Gm49336
Mmd	Mettl3	Nmt2
Large1	Zfp58	mt-Co2
Serpina3n	Vps37b	2610021A01Rik
Gm36283	Pde9a	Ehmt1
Aimp2	Gpr34	Nup93
Fam20c	Fchsd2	Pcsk5
Lrrc8d	Stxbp2	Gulp1
Atp6v0c	Marveld2	Pabpc4
Mettl24	Eya4	Cep170
Gm47078	C530008M17Rik	Wsb1
Gpx1	Trps1	Chfr
B4galt2	Adal	Ak2
Ssx2ip	Slc26a6	Rb1cc1
B430219N15Rik	Olfr1459	Cyp3a41a
Tm4sf19	Scml4	Pex2
Topaz1	Traf2	Gm21750
Pcmt1	Pim2	Dock1
Prmt2	Ccdc167	Lilrb4a
Dmpk	Trpc4ap	Lcor
Slc1a1	Spib	Pcgf3
Mrps18b	Tgtp1	Rasd1
Clmp	Arhgap45	Med12l
Rer1	Sacs	Tec
Wipi1	Rab3ip	Anapc15
Slc25a4	Man2c1	Selenop
Gm47103	Xpo7	Acrbp
Ttc12	Fga	Mbd3
Faim2	Snn	Lin9
AC168977.2	Dhtkd1	Plagl2
Spag4	Utp20	Reck
Atg12	Ovca2	Uck2
Nudt7	Acsm5	Trmt112
B430212C06Rik	Zfp78	Id2
Slc35g1	Emp3	Zbed4
Cdk5rap3	Mgat1	Vrk2
Hsd17b7	Tsku	Vps13a
Napa	Cnp	Gm14401
Psmc4	Acp5	Kmo
Srl	Cldn2	Letmd1
Bcat1	Nme7	Pik3r1
E330011O21Rik	Serpind1	Cldn14
Plekhh2	Rapgef4	Helq
Pgm5	Gprc5c	Zfp81
Zfyve27	Rpl37a	Smim15
Lurap1l	Ttc37	Arhgap25
Yap1	Dnal4	H2-Ob
Commd9	Mllt6	Cep57
Ykt6	Nlrc5	Zfp672
Mrc2	Ly6a	Phactr4
Ogg1	Med25	Rtel1
Nek6	Pigh	Dnajb6
Asrgl1	Taf1a	Daam1
Galm	Abhd3	Casp7
Ube2n-ps1	Mtrr	Zfp934
Lrrc27	Mlc1	Fmo1
Hspa1a	Trrap	Dock9
1700094D03Rik	Zbtb24	Suz12
Plau	Prrc2c	Slc38a4
Ccn5	Gm39556	Trak1
Gng5	Aqp3	Nes
Tnfrsf23	Klhl8	Dcun1d1
Map7d1	Gm10033	Il15
Gm14444	Hsd3b3	Zfp524
Ugt1a6a	Lypla1	Rp9
Cope	Lmo7	Usp2
Etv4	Csad	Dennd2d
Park7	Rgl1	Nfat5
Plpp2	Bptf	Them4
Ccn1	Cd4	Zfp780b
Cyp2c70	Arhgef15	Ecscr
Cstb	Fam219a	Arid4a
3110040N11Rik	Snf8	Nsrp1
Polr3g	Rftn2	Crebrf
Gm49909	Senp6	3830406C13Rik
Cd151	Snupn	Hsd17b11
Arf1	Tpt1	Phka1
Plaat3	Cmah	Rnf38
Gm12671	Cacna1i	Btbd9
Abcf2	Zscan20	Sdccag8
Paqr7	Sema4d	Elovl6
4930470H14Rik	Card6	Iigp1
Adh6b	Cd207	Matk
Pramef12	Washc2	Chd5
Tmem204	Rhbdd3	Fbxo33
Pdgfb	Cyp2c50	Lpar1
Gm47102	Trim5	Fam241a
Nars	Gpn1	Alas1
Tbc1d7	Sft2d3	Epb41l2
Mrpl17	Ints3	Fcho2
Hspa5	E130311K13Rik	Pafah1b1
Ssr2	Hs3st3b1	Limch1
Cops5	Gm7609	Ing5
Hfe	Siglech	Mllt3
Ttyh2	Rph3al	Mapk1
Aldh7a1	Gimap8	Faf2
Ehbp1l1	Cnnm3	Glmn
Ubtd1	Dsg2	Aff3
Vps25	Pid1	Zfp345
Jmjd8	Eef1a1	Ktn1
Tm2d2	Zfp119a	Stx6
Cyp4v3	Samd9l	Zbtb25
Mpdz	Senp8	Add3
Exoc7	Sfi1	Dap3
Cdc42ep2	Fgf12	Mrpl32
Dcbld2	Igsf23	Aurkb
Mmp12	Ifit3	Pex5l
Pm20d1	Arih1	Tcim
F7	Ndfip1	Tkfc
Iffo2	Zbtb8os	Srpx
Idh1	Trbv13-3	Poli
Tpm1	Gstz1	Nif3l1
Adam12	Tespa1	Rbm25
Myo1c	H2-K1	Naa10
Gm19196	Unkl	Dazap1
Pip4k2c	Ammecr1l	Serpine2
Akr1b3	Rest	Phf7
Ptchd4	Stat5a	Zfp420
Pnp2	Mdm1	Zfp280c
Kcnj15	Rhof	Sftpa1
Car12	Havcr2	Adam1a
Lipt2	Shroom1	Cop1
Vsig8	mt-Nd5	Tsen34
Mmachc	Ppcdc	Smim1
Pdxk	B3galt2	Zfp597
Pole3	Lrriq3	Erlin1
Calhm5	Zfp933	Arhgef1
Ergic1	Bcl2	Rps24
Rab1b	Apobec3	mt-Nd4
Rhoq	Cd1d1	Ppp1r14b
Gm48216	Zfp974	Klhdc3
Katna1	Tmem260	Dpm1
Vcp	Sox17	Nid2
Psmc3	B3galt6	Prpf3
Cyb5b	Slc22a1	Arnt
Prkag1	Ets1	Ash1l
Rars	F2rl1	Mok
Mvk	Irgm1	B3galt4
Mfsd3	Zfp248	Gm45692
Steap3	Zfp493	Slc4a1ap
Timm17a	Cd40lg	Sgf29
Aarsd1	Itga10	Rnf13
Gm42809	2810004N23Rik	Vezf1
Chmp7	Ears2	Gpr155
Sil1	Car3	Ccdc163
Fuca1	Numb	Rnf146
Dda1	Ubqln1	Csnk1g3
Psma6	Cyp4a14	Armh4
Lama5	Col24a1	Brd4
Dctn5	Dab2ip	Eea1
Tmem59	Dis3l	Nolc1
Mrpl20	Knop1	Sult5a1
Nudt1	Ido2	B230118H07Rik
Acoxl	Rps27a	Usp49
Lpar3	Maged2	Kif20b
Pdzd11	Azin1	D3Ertd751e
Elovl1	Trbv31	Sel1l
Mrps14	Cdyl2	Rfx5
Olfm4	Limd1	Slit2
Junb	Crym	Slc38a2
Gm6710	Abhd14b	Cfap97
Atp1a4	Trmt1	Ttc7
Gm45819	Tmem68	Lrrn3
Aamp	Mug2	Csrp3
Mettl27	Fbxl5	Sdad1
Jag1	Atp11a	Map3k9
Ccl7	Timm10b	Cenpu
Gm47654	Cyp2a12	Ptgis
Psmf1	Adgrg5	Lrrc8c
Shf	Mterf4	Gabpa
Gm45512	Pex6	Fip1l1
Zwint	Sema4a	Ebf3
Tspan17	Chpt1	Rbm5
Spats2l	Arhgap12	Add1
Plcb1	Nmd3	Zc3h8
Gm48430	Abi1	Zmym5
Psmc5	Rtl6	Rbm4
Mrpl57	Itgb1bp1	Anks1
Dnaja4	Slc17a4	Abr
Psmd2	Ntrk3	Mttp
Tex264	Afg1l	Olfr976
Hras	Tyk2	Tmcc1
Ckb	Tmem126b	Neb
Tubb2a	Dgkb	Lifr
Rbm28	Rps5	Tor1aip2
Mlf2	Fam199x	Noct
Stradb	Elf2	mt-Nd2
Hif1a	Ncald	Zmym2
Gm49333	Swap70	Vgll4
Clybl	Mettl4	2700049A03Rik
Sod2	Rps13	Rnf180
Tpd52l2	Nudt16	Pik3cb
Ccdc85b	Kyat3	Nhlrc2
Memo1	Erbb4	Bclaf3
Id3	Map3k4	Vmn2r90
Cltb	Klb	Npr2
Prag1	Sdhaf2	Rgs16
Asna1	Smug1	Gls2
Htatip2	Ms4a6b	Mast4
Pqlc3	Ifi214	Mcm10
Rab1a	Lpp	Tdrd3
Grb14	Kcnh1	Ip6k1
Pak1ip1	Zfp799	Inhbb
Stambpl1	Det1	Ackr2
Mfge8	Jkamp	Dhcr7
Vps29	Usp11	Nkx2-3
Mfsd2a	Plec	Prnp
Ranbp17	Klf12	Zhx3
Pla2g2e	Cpb2	Olfr318
Gm19531	Pik3c3	1700037C18Rik
Xpnpep1	Ifi209	Ccnt1
Nedd8	Ankib1	Senp1
Orm1	Nrap	Nipbl
Rnf10	Rrp36	Zfp512
Lamtor2	Zfp870	Pbxip1
Nol3	Mif4gd	Ubap2l
Nudcd2	Med28	Samd3
Zfp469	Glyctk	Irf2
Ulk4	Serpinf2	Bcs1l
Adh6-ps1	Mfn2	Polr2k
Cog4	Trmt10a	Trip11
Plk3	Serpinb7	Ubr2
Anxa5	Slc39a9	Rasa4
Arl8b	Tpst1	Trbv19
Gle1	Ms4a4c	Tdo2
Lipf	Acap1	Snrk
G6pc3	Ube2d1	Sdk1
Atp9a	Rfx3	Mcf2l
Triap1	Ttbk1	Rnf220
Psmd3	Cog8	Chd7
Tent5b	Tnfrsf25	BC005537
Aagab	Vtn	Col27a1
Caml	Mettl17	Ccbe1
Stimate	Gstm6	Gm14419
Lrrc9	1190007I07Rik	Acin1
Gm5796	Dynlt1a	Dph3
Apln	Slc10a5	Inpp1
Hspa12a	Tom1l2	Phospho2
1700041M05Rik	Cbx7	Heatr3
2210016F16Rik	Fbxl21	Itk
Elob	Nfkb1	Zfp429
Mn1	Izumo1r	Tgfbr3
Gm39090	Tnfrsf13b	Cep350
Fdps	Fis1	Agrn
AL731706.1	Rab11fip4	Srf
Bche	Zfp280d	Flnc
Hpcal4	Rttn	Slc1a7
Klc4	Psma4	Slc27a6
Prpf6	Tmem25	Gm3558
6530402F18Rik	Gemin7	Otc
Anln	Nfatc2	Cmc1
Eif2s1	Gbp4	Lpin1
Bcap31	Eps8	mt-Nd4l
Trappc1	Cables2	Slc27a5
Pno1	Lats2	Zfp617
Mycbp	Pja1	Tnfrsf22
Mrpl53	Med8	Ercc6l2
Lamtor1	Iglon5	Mfn1
Erc2	Pacs2	Mxi1
Cacng5	Angel1	Slfn9
Klf14	Kif21a	Pprc1
1810058I24Rik	Amt	Rasgef1b
Cgrrf1	Spcs2	Pcdh15
Psma2	Rpl18a	Rad52
Cystm1	Rpl30	Ncapg
Sh3bp5l	Baiap2	mt-Nd3
Gabrr2	Azgp1	Mphosph10
Mark1	Med17	Ralbp1
Eprs	Fig4	Usp53
Morrbid	Bcorl1	Ddx23
Ppic	Foxp3	Ap1g1
Cndp1	Kcnn2	Cyp3a44
Gorasp1	Huwe1	Mmut
Spg21	Ripk1	Astn2
Cplx1	Dhx34	Cyp2c29
Prps1	Rps7	Actn4
Tfg	Lmbrd2	Zfp62
Ttc1	Gm5134	Uqcrb
Letm1	Mon1b	Frs2
Tmem132b	Hs3st1	Ncor1
Jup	Pcbp4	Tars2
Tmem208	Dock11	Pi4kb
Ap4s1	Cox6c	Atg7
Smpd2	Ppp4r4	Rbms3
Map7d2	Tsc1	Anpep
Nln	Hikeshi	Arg1
Micos10	Cyp3a13	Herpud1
Eloc	Znrd1as	Fbxw7
Srp14	Klri1	Mtf1
Ugt1a8	Acat3	Cnmd
Tymp	Mettl2	Gda
Wfdc21	Virma	Surf2
Slc48a1	Lbh	Mal2
Mtfr1l	Ncoa7	Sec61a2
Ccdc159	Gpatch2	Ipo7
Rnase10	Chuk	Cipc
Abcb9	Acap2	Qrich1
Qdpr	Pmaip1	Ogn
Lhfpl2	Cep63	Sec24a
Tmem43	Frem2	Msr1
Tuba1b	Hmgn1	Ikzf5
Kmt5a	Rabgap1	Pank3
Ftsj1	Usp28	Synj2bp
Adamts2	Galk2	Cdkl5
Wdr93	Prkcq	Ric8b
Gm20536	Pole4	Csnk1e
Ntn3	Tspyl3	Sgtb
Gm38398	Sbf1	Pheta2
Rcan1	Ces1f	Tlk2
Thap7	Gm28778	Rmdn1
Gm8237	Snapc4	Mtch1
Abcd3	Hspb11	Caprin2
Eif2b1	Ccn3	Ralgapa2
Ift22	Arhgef18	Guf1
Lrrc15	Serpinc1	Tbc1d31
Spsb1	S1pr4	Fnip2
Dctn2	Klhl42	Ncam1
Phb	Cyb561a3	Ces1e
Zfand3	Wdr12	Mlf1
Sae1	Rslcan18	Angel2
Tmem254b	Cxcr5	Shld1
Gm45716	Cwf19l2	Foxq1
Srprb	Trac	Phlpp2
Gm50216	Alg1	Mef2a
Gm4065	Gpatch1	Gatad2b
Anxa2	Ambra1	Hnrnpr
Ppfia3	Usp20	Prmt1
Atp6v0d2	Rasgrp3	Lime1
Mrps7	Itih2	Zfp809
Rpe	Zfp956	Pls3
Skp1a	Tub	Cenpk
9530068E07Rik	Zbp1	Nfasc
Uba3	Birc6	Akt1s1
Vps53	Satb1	Xaf1
Ap3b2	Ugt3a2	Slc25a23
4933427J07Rik	Ilvbl	Ubtf
Mcrip1	Slc25a27	Zfp605
Kcnu1	Prodh2	Med1
Pgf	Dnajc15	Mcee
Poln	Lrrc61	Aspg
Med9	Gtf2h2	Olfr365
Greb1	Hemk1	Plekhg2
Schip1	Rai1	Naca
Bbs4	Rcl1	Zfp160
Rad50	Dclk2	Strn3
Golga7b	Cd3g	Zfp451
Fam43a	Eif2d	Tbc1d20
Qpctl	Rad1	Smad3
5033430I15Rik	Ppp1r13b	Prpf39
Rasl11b	Tmem87b	B3gnt5
Anxa3	Suco	Rmnd1
Nmnat2	Sirt4	Zfp110
Ddb1	Eogt	Akt2
Ankrd9	Atp8a1	Mrpl21
Svopl	Iqce	Paip2
Ghdc	S1pr1	Nol8
Cav1	Bbx	Tmx4
Ftsj3	Slc27a2	Vmn2r97
Spsb4	Hs1bp3	Prdm11
Tmc5	Kat8	Tasp1
Adgrb2	Rdh5	Chchd1
Rgsl1	Tyw3	Aifm2
Plppr2	Rps18	Vmn1r213
Gm21962	Xkrx	Racgap1
Ankrd23	Tprkb	Cox16
Kank2	Tes	Mterf3
Olfm1	Tbc1d12	Mdn1
Rhod	Apoc4	Srcin1
Higd2a	Cyb5d2	Zfp982
Sec61g	Trappc8	Dapp1
Ppp2ca	Igkv2-109	Atp5j
Rnf11	Ighv1-39	Cask
Ptgfr	Ccl25	Lrp6
Kcna5	Med7	Tmed5
Ptges3l	Oprd1	Abca8a
Faf1	D10Wsu102e	Jun
Rft1	Dnajc7	Zfp946
Dynll1	Xiap	Il1rap
Dpep3	Cbr4	Lrit2
Sox13	Nucb2	Thbd
Psma5	Trdc	Dsc2
Arfgap1	Acbd4	Twsg1
Ccng1	Zfp958	Rad51c
Mfsd8	Pigr	Ccdc69
Copb2	Erap1	Srbd1
Gps1	Zfp446	Usp15
Fcsk	Cyp3a11	Psd3
Frrs1	Aadac	Mfap1a
Them5	Trav7-2	Usp31
Timm22	Bfsp2	Afm
Apip	Pank2	Rab14
Cdc123	Sdhaf3	Atxn2
Pam	Srcap	Stc2
Gapdh	Cebpa	Serpina6
Slc9a3r2	Ankrd1	Syn3
Crot	Ighv11-2	Sp1
Fam163a	Cnga1	Sumo2
Aktip	Dcaf11	Prss23
Lap3	Nlrp10	Tmem156
Ddah2	1700001C19Rik	Mdfic
Cxcl2	Rps16	Atp1b1
Zfand2a	Chrd	Hdhd2
Trim16	Zfp646	Akap7
Ipo13	Zfp418	Ccny
Lmntd1	Rfx2	Stag2
B230311B06Rik	Clec4a4	9930021J03Rik
Catsper3	Nhsl1	Pin4
Hspb2	Ighv1-49	Vps26a
Alg5	Trbv13-1	Pold3
Psmd7	Entr1	Fbxl12
Cyb5d1	Rps11	Parg
Chrnb1	Rps27	Por
Dohh	Necab1	Wdr45b
Gm26877	Sag	Taf1d
Gm29562	Acox2	Smim7
Snapc5	Plekhg5	Pkig
Iscu	Jrk	Sema3b
Ltbp4	Napg	Cox7c
Sardh	Cd69	Mrpl39
Glb1l2	Dbnl	Sms
Hbegf	Cyp2f2	Znhit6
Ptx3	Il21	Tpx2
Rarb	Ddb2	Adra2b
Hsd17b4	Atl3	Mfap1b
Htra4	Trim34b	Cep104
Vcl	Kbtbd11	Hnrnpk
Tsg101	Slc4a7	Rsrc2
Ube2n	Gbp10	Elmod3
Alg14	Decr2	Odf2
Rnd3	Fbxl4	Cers6
Thnsl1	Dhx30	4931414P19Rik
Sfxn5	Ppp1r21	Mdm4
Prpf19	Zfp637	Scd1
Sdhaf4	Armc2	Slbp
Slc2a10	Nat8f1	Hykk
Aplnr	Slc5a6	Hmgn5
Gas8	Ocel1	Pdpk1
Golim4	Wdfy2	Krit1
0610010F05Rik	Trbv3	Thoc2
Dhdds	Klk8	Zfp872
Angptl2	Chtf8	Cpeb3
Ntsr2	Plcg1	Wdfy1
Rn7sk	Cacna2d4	Fam205a3
Lmln	Gm9903	Gfod1
Fam214b	Hint3	Gpbp1l1
Bzw1	Myh14	Slc14a1
Thyn1	9930111J21Rik1	Eng
Prdx1	9930111J21Rik2	Gpr82
Ube2v1	Itgb8	Uri1
Klhdc10	Mcoln3	Ciz1
Rrp1	Rpl31	Ahcyl1
Gm31814	Gpr83	Coro1a
Rnf128	Bhmt	Ggps1
Mrps36	Rasgrp1	Casq2
Anxa7	Fam192a	Zfp322a
Pkia	Nectin3	Pde8a
Ppip5k1	Tagln2	Ccnh
Tekt2	Ube2d3	Ppwd1
Apopt1	Pkd1l3	Plppr5
Cpt1b	Sp110	Ociad1
Mb21d2	Snx29	Baz1b
Chrm4	Zfp169	Cilk1
Mrpl28	Ift172	Spast
Cyp4f16	Slc16a7	Cnot1
Nkiras2	Zbtb7b	Srfbp1
Gm3264	Snx19	Smurf2
Bcl2l10	Esyt1	Fkbp15
Loxl1	Fam53a	Fam47e
Trem2	Gatb	Slc16a5
Sec22b	Zfp426	Rnf111
Zfp423	Ighv1-78	Trmt1l
Gm47578	Zfp961	Zfp740
Tsc22d2	Ddx19a	Zfp932
Dmtn	Angptl6	Olfr338
Greb1l	Bscl2	Simc1
Zbtb14	As3mt	Camsap2
Urod	Faap20	Svil
Myh11	Eya2	Ddhd1
Gm5460	Rps20	E130308A19Rik
Rtp3	Rnf34	Trim33
Ywhae	Chst10	Ascc3
Sh3tc2	Fnbp1	Blnk
Degs1	Agpat3	Tent4b
Afap1l2	Xrcc4	Zfp959
Mien1	Ankfy1	Pbx3
Fhod1	Rnf121	Ppp2r5e
Cks1b	Nnat	Prrg1
1500002F19Rik	Opn3	Glod4
Cdcp3	Mbl2	Zswim6
Ptrh1	Zfp185	Wdr7
Emp1	Atp1b3	Arl3
Serf2	Slc25a53	Cln3
Ddx1	Gbp6	G0s2
Cdr2	Serpina1e	Aldh18a1
Setd7	Smpd3	Slirp
Hpx	Tmem198	Coq10b
Coa3	Lrrc23	Pex1
Pfkfb4	Sap130	Ap5b1
Ppil3	Trav7-1	Hyal1
Ciao1	Ppp1r9a	Trim24
Gmpr2	Tjap1	Gemin2
Nkain1	Prrg3	Hmga2
Pitx3	Gm29394	Nlrp1b
Rtn2	Ppp1r13l	Ywhaq
Klhdc9	Smarcd3	Hopx
Serf1	Mybpc1	Socs4
Atp6v1h	Dnajc8	Rapgef3
Kirrel3os	Stum	Nop14
Hagh	Mdga1	Adh1
Opa3	Exosc9	Srsf11
Ufc1	Tonsl	Xlr
Vegfd	Npas3	Mtss1
Tmsb15b2	Ndufab1	Gdpd3
Cryab	Lmtk3	Tef
Aldh1l1	Ccl27a	Zfp931
Mfap4	Slc44a5	Gtf3a
Slitrk1	Col11a2	Anapc13
Tmx2	Kif4	Dek
Focad	Sirt1	Map2k7
Csrp1	Sh3bp2	1700030K09Rik
Zan	Efcab9	Ankdd1b
F3	Cad	Akr1e1
Sigmar1	Bend6	Brd7
Ghitm	Col9a2	Slc44a4
A730056A06Rik	Lonrf2	Fam177a
Slc35a4	4930467E23Rik	Myadm
Snai1	Coro6	Cr2
Gm14409	Pla2g4a	Klf10
Prxl2b	Rbfox3	Fbxl19
Aadacl2fm3	Odf2l	Gps2
Cdh23	Pde6g	Rpl18
Arl16	Banp	Casc3
Glrx5	Pla2g4b	Rps14
Rnase2a	Camk2g	mt-Co1
Plod1	6330403K07Rik	Magi2
Gm10359	Apbb1	Tbp
Enpp6	Tmem269	Smc6
Isca2	Smim8	Gatad1
Mpp7	Zfyve21	Smtn
Ttc7b	Neurod4	Swt1
Dnajb4	Ptk2	BC049715
Psmd13	Amotl2	Fgd5
Psmd1	Twf1	Cdk13
Ssu72	Kxd1	Igkv9-124
Yif1b	Tmem42	Sulf1
Gaa	Dlgap3	Stx16
A630076J17Rik	Ncdn	Aadat
Tdrkh		Evl
2810025M15Rik		Rap1a
Shroom2		Nnt
Gm47863		Raly
Mgat5		Pikfyve
Slc38a10		H2-Q10
Nfe2l2		Zfyve16
Hacd2		Ttc9c
Gm38391		Chst3
Hoxa10		Xylb
Gsg1l		Dnpep
Sec13		Slx4ip
Cyp2c23		Arl5b
Mrap		Mrto4
Napepld		Haao
Rhbdf1		Suv39h1
1110032A03Rik		Rab44
Gm50042		Rrp7a
Zswim7		Zscan21
Utp14b		Hormad2
Pxmp4		Mbnl1
Armc6		Itgb3bp
Tmem17		Zfp654
2810433D01Rik		Rapgef2
Abca8b		Stam
Psmb7		Pias2
Dtna		Fam222b
Ccdc25		Stard13
9430062P05Rik		Ncoa4
Poldip2		Dync2h1
Rnf165		Rps3
Pdia6		Zfr
Il17d		Lsm5
Dmrt2		BC004004
Gm11748		Gm49358
Gnao1		Mtdh
Haus7		Slc25a22
Tmem135		Fxyd4
Gm21917		Med15
Trappc13		Cir1
Wnt8b		D11Wsu47e
Naa38		Zfp14
Myo19		Jmjd1c
Amz2		Mcm7
Hmcn2		Pcdh18
Atp8b1		Ccr9
Sod3		Caap1
Bpnt1		Cd180
Gm10053		Rrnad1
Kcnb1		Casp8ap2
Hacd1		Olfr889
Bod1		Rgs17
Akr1b8		Cyfip1
4931428L18Rik		Smarcad1
Slf1		Cd59b
Pcyox1		Synpo
E2f1		Tmem256
Akirin1		Nup107
Rnf5		Rabggtb
Plin2		Egfl7
Gm36827		Maob
Mcfd2		A630089N07Rik
Coprs		Rbm4b
Susd5		Crppa
Ldhd		Ak5
Got1l1		9930012K11Rik
Scx		Praf2
Lmod1		Cbfa2t3
Rab11a		Cd36
Igfbp5		Scmh1
Tmem97		Ern1
Cthrc1		Tfam
Romo1		Mavs
Gm10382		Eif2a
Nfic		Mterf2
Dcst1		Kctd13
Pelp1		Vps35l
Gm10182		Atxn7
Eif3b		Ubxn6
Fkbp14		Lilra6
St3gal3		Ppp1r12a
Ercc3		Myo3b
Slc39a3		Pole2
Duoxa1		Cysltr1
Dynlt1b		Sos1
Olfr558		Tarbp2
Kcne1l		Tnfsf11
Btbd10		Naxe
Enah		H2-Bl
L3hypdh		Cacna1a
Ptprk		Foxo3
Pde7b		Gfra2
Ptgfrn		Klf13
Mrps34		Igf1
Hprt		Tiam1
Ufm1		Chchd3
Atf5		Rabep1
Spatc1		Phtf2
Lxn		Prkacb
Rbfox2		Bid
Rheb		Tmtc3
Rnf181		Gripap1
Psmd12		Olfr639
Psat1		Pde2a
Tmem192		Nbr1
Tulp3		Cbx5
Nedd9		Npat
Lrrc20		Gm5415
Nomo1		Atad1
Snapin		Pitpnc1
Fcor		Nt5c3b
Surf4		Slfn3
Wdr66		Slc25a32
Ajuba		Snca
Ctnnal1		Trim45
Fhl2		Tmcc2
Inpp5a		Stap1
Smtnl2		Terf2
Ergic3		Pcgf5
Vangl1		Strip2
Rnf185		Atp8b4
Lzts1		Zdhhc21
Mrpl40		Cdc42bpa
Hdlbp		Gcc2
Fam181b		Atp6ap1
Dap		Cys1
Fmr1		Cyp2a22
Fgf21		Phb2
Rn7s1		Inpp5b
Rn7s2		Mme
Asb12		Pear1
Ost4		Plxdc1
Tph1		AW554918
A230028O05Rik		Wdr26
Kirrel3		Wscd2
Uhrf1bp1		Cfh
Rassf8		Arhgef25
Commd3		Nrxn3
Dtd2		Fbrs
Gtse1		Snapc1
Fkbp8		Papolg
D630024D03Rik		Cetn3
Mrps28		Jph1
Aldh1a1		Helb
Gm38431		Gabpb2
Aoc1		Cers5
Serpina3c		Nfe2
Pin1		Klf4
Ndel1		Clcn7
Pex16		Has3
Blmh		Gpatch8
Aldh1a7		Agpat1
Psmc1		Tmem243
Denn2b		Ppp6r3
Kpna6		Ppp1r10
Lsm1		Efcab2
Btg2		Ablim2
Gpc1		Pde4a
Tmem70		Igkv4-86
Osbpl2		Pdp2
Klhl13		Map4k3
Tmem189		Rpl34
Slc25a15		AI597479
4931428F04Rik		Cd226
Tceal8		Itpr2
BC029722		Olfr1175
Med29		Zbtb20
Gm7932		Crip3
Dnajb14		Usp1
Tpcn1		Homer1
Ndufa11		Kmt2e
Dcstamp		Tomm34
Eno1		Nktr
Pcsk2		Fktn
Rps19bp1		Klrc2
Rab6a		Nfe2l1
Pdf		Smoc2
Gspt1		Zfp871
Bco1		2700081O15Rik
E2f6		Sinhcaf
Ccdc124		Vegfa
Selenof		Zfp770
Mrpl41		Kiss1r
C030017G13Rik		Ubn1
Oip5		Akr1c19
Myom3		Atxn2l
Nap1l4		Zscan22
Spred1		Kars
Mgmt		Dock5
Kpna4		Zfp189
Gk		Zdhhc13
Alx4		Rbm12b1
Ddx49		Zfp385b
Tmem126a		Srsf7
Cript		Dnajc14
Trf		Apex2
Eif1ax		Fbxo22
Kbtbd12		Olfr1336
Hspa1b		Dlg1
Rtn4		Txlng
Gm35371		Elf1
Ets2		Rffl
Dnajc4		Zkscan8
A830008E24Rik		Smim10l2a
Rem1		Klhl38
Hpse2		Hmga1
Fam177a2		Cybc1
Tgfb1i1		Naa50
Thumpd3		Ly6k
Anapc2		Tecr
Tax1bp1		Hspe1-rs1
Wdr60		Pard3
Otud6b		Tra2a
Spats2		Fech
		Rassf5
		Relt
		Lmntd2
		Rps6ka5
		D430042O09Rik
		Abracl
		Mthfs
		Anapc5
		Kcnk7
		Polq
