# Supplementary material for: Multi-Omics Profiling Identifies Biomarker Candidates and Pathogenic Divergence Between Post-Transplant Diabetes Mellitus and Type 2 Diabetes
Source: Research Square preprint supplement (doi:10.21203/rs.3.rs-7682951/v1), 2025-10-10
Supplement: Supplementary file 4 [file f46d7490dc3366083e0bcb77.xlsx]

## Sheet: POS_LIVER
id	MS2 name	MS2 score	MS1 name	MS1 ppm	rt	mz	SuperClass	type	MEAN _STZ	MEAN _TAC	VIP	P-VALUE	Q-VALUE	FOLD CHANGE	LOG_FOLDCHANGE
79	Pinostrobin chalcone	0.821539			233.264	271.097	Phenylpropanoids and polyketides	forward	0.0262593	0.052608	2.20046	0.00347981	1	0.499151	-1.00245
130	Isolinderanolide	0.700583			216.45	337.278	Organoheterocyclic compounds	forward	0.0368619	0.0618528	2.28649	0.00203587	1	0.595961	-0.746711
164	PC(18:1(11Z)/P-16:0)	0.631059			64.9764	744.602	Lipids and lipid-like molecules	forward	0.0118291	0.00309621	1.39577	0.0395581	1	3.8205	1.93376
172	PC(22:4(7Z,10Z,13Z,16Z)/15:0)	0.611962			156.379	796.593	Lipids and lipid-like molecules	forward	0.280568	0.415573	1.92162	0.0347042	1	0.675136	-0.56675
188	PC(22:6(4Z,7Z,10Z,13Z,16Z,19Z)/18:1(11Z))	0.593349			152.113	832.598	Lipids and lipid-like molecules	forward	2.99682	4.29341	2.07352	0.0143904	1	0.698004	-0.518693
196	PC(22:6(4Z,7Z,10Z,13Z,16Z,19Z)/P-16:0)	0.579065			218.221	790.569	Lipids and lipid-like molecules	forward	0.0062836	0.0026511	1.74611	0.0402534	1	2.37019	1.245
201	Thymidine	0.557934			322.149	243.099	Nucleosides, nucleotides, and analogues	forward	0.0462386	0.107545	2.16273	0.0096718	1	0.429947	-1.21777
209	6-Methylcoumarin	0.54364			371.683	161.062	Phenylpropanoids and polyketides	forward	0.0299977	0.0392699	2.15397	0.00935941	1	0.763885	-0.388573
217	PC(20:5(5Z,8Z,11Z,14Z,17Z)/22:4(7Z,10Z,13Z,16Z))	0.517038			150.453	856.597	Lipids and lipid-like molecules	forward	0.195799	0.292256	1.75782	0.0499245	1	0.669958	-0.577857
242	LysoPC(20:4(8Z,11Z,14Z,17Z))	0.475001			207.744	544.348		forward	5.56811	10.6085	1.96917	0.0404998	1	0.524875	-0.929955
258	Cis-zeatin	0.429237			291.191	220.121	Organoheterocyclic compounds	forward	0.0185688	0.0397009	2.09546	0.0231831	1	0.467718	-1.09629
273	PC(20:4(8Z,11Z,14Z,17Z)/15:0)	0.37769			159.021	768.563	Lipids and lipid-like molecules	forward	1.34713	0.79258	1.70816	0.0404566	1	1.69968	0.765265

## Sheet: POS_PANCREAS
id	MS2 name	MS2 score	MS1 name	MS1 ppm	rt	mz	SuperClass	type	MEAN _STZ	MEAN _TAC	VIP	P-VALUE	Q-VALUE	FOLD CHANGE	LOG_FOLDCHANGE
22	Caffeine	0.959709			367.331	195.088	Organoheterocyclic compounds	forward	0.0269799	0.0230631	1.96818	0.0147105	0.555791	1.16983	0.226296
33	5-(2-Methylpropyl)tetrahydro-2-oxo-3-furancarboxylic acid	0.940278			50.388	187.097	Organoheterocyclic compounds	forward	0.00814231	0.00216162	1.37182	0.0100459	0.530245	3.76676	1.91332
79	Pinostrobin chalcone	0.821539			233.264	271.097	Phenylpropanoids and polyketides	forward	0.0298073	0.0392456	1.84982	0.0336044	0.634959	0.759508	-0.396862
85	Albanol B	0.807455			441.811	559.135	Phenylpropanoids and polyketides	forward	0.00116294	0.00164031	2.17891	0.00375867	0.489757	0.708979	-0.496186
99	Nb-Methyltetrahydroharmol	0.772424			388.888	217.132	Alkaloids and derivatives	forward	0.0530717	0.095611	2.26188	0.000861407	0.41524	0.55508	-0.849234
102	D-Galactose	0.767355			468.361	163.063	Organic oxygen compounds	forward	0.00595024	0.00503096	1.9968	0.0132645	0.543335	1.18272	0.242113
131	PC(16:1(9Z)/22:1(13Z))	0.696072			104.398	814.637	Lipids and lipid-like molecules	forward	0.0129267	0.0385329	2.11015	0.00318257	0.479175	0.33547	-1.57574
166	PC(22:6(4Z,7Z,10Z,13Z,16Z,19Z)/22:2(13Z,16Z))	0.627957			146.968	886.646	Lipids and lipid-like molecules	forward	0.197147	0.322076	1.91476	0.0198888	0.587985	0.612113	-0.708129
172	PC(22:4(7Z,10Z,13Z,16Z)/15:0)	0.611962			156.379	796.593	Lipids and lipid-like molecules	forward	1.22426	0.440019	1.39951	0.0363817	0.64147	2.78228	1.47627
175	PC(22:5(4Z,7Z,10Z,13Z,16Z)/20:5(5Z,8Z,11Z,14Z,17Z))	0.607843			189.621	854.567	Lipids and lipid-like molecules	forward	0.00119987	0.00470263	1.94265	0.0439531	0.655479	0.255149	-1.97059
190	N-Methyltryptamine	0.585965			549.014	175.121	Organoheterocyclic compounds	forward	1.37871	0.945943	1.91073	0.020374	0.590298	1.4575	0.543493
230	(-)-Thebaine	0.498576			25.4337	312.16	Alkaloids and derivatives	reverse	0.00617397	0.0054573	2.25389	0.000254979	0.41524	1.13132	0.178009
237	1-Hydroxy-3-methoxy-10-methylacridone	0.483088			427.356	256.098	Organoheterocyclic compounds	forward	0.0144084	0.0291308	2.01913	0.0217702	0.596467	0.494611	-1.01563
252	1,2,3,4,Tetrahydro-1,5,7-trimethylnapthalene	0.444865			555.348	175.147	Benzenoids	forward	0.787484	0.561559	2.07307	0.00876577	0.526445	1.40232	0.487813

## Sheet: NEG_LIVER
id	MS2 name	MS2 score	MS1 name	MS1 ppm	rt	mz	SuperClass	type	MEAN _STZ	MEAN _TAC	VIP	P-VALUE	Q-VALUE	FOLD CHANGE	LOG_FOLDCHANGE
23	D-2,3-Dihydroxypropanoic acid	0.991156			323.341	105.02	Organic oxygen compounds	forward	0.21765	0.153869	1.71734	0.0346821	0.340169	1.41451	0.500306
58	Succinic acid semialdehyde	0.959549			392.25	101.025	Lipids and lipid-like molecules	forward	1.0095	0.808761	1.91391	0.0131615	0.195094	1.2482	0.319849
76	D-Ribose	0.918471			82.9003	149.047	Organic oxygen compounds	forward	0.743098	0.430437	1.78737	0.0228443	0.26595	1.72638	0.787749
107	Methylsuccinic acid	0.821108			192.254	131.036	Lipids and lipid-like molecules	forward	0.636763	0.429087	1.61946	0.0458431	0.39458	1.484	0.569487
124	N-Acetyl-L-alanine	0.754654			272.755	130.052	Organic acids and derivatives	forward	0.191212	0.288449	1.8964	0.0202398	0.246597	0.662898	-0.593141
128	(R)-lipoic acid	0.738698			5.43621	223.023	Organoheterocyclic compounds	forward	0.114241	0.0879044	1.80105	0.0131579	0.195094	1.29961	0.378075
130	(Z)-Resveratrol	0.736939			312.918	227.08	Phenylpropanoids and polyketides	forward	0.094586	0.0607306	1.99023	0.00174458	0.195094	1.55747	0.639203
155	Pyrrole-2-carboxylic acid	0.630375			506.163	110.025	Organoheterocyclic compounds	forward	0.0889257	0.0735985	2.02232	0.00265142	0.195094	1.20825	0.272924
172	Aldehydo-D-xylose	0.569681			190.537	149.047	Organic oxygen compounds	forward	0.403253	0.250652	1.74913	0.0223985	0.262761	1.60881	0.685998
185	2,2-Dimethylsuccinic acid	0.499983			5.41748	145.052	Lipids and lipid-like molecules	reverse	0.0319338	0.0291668	1.89812	0.0104669	0.195094	1.09487	0.13076
190	Nicotinic acid	0.472694			419.181	122.025	Organoheterocyclic compounds	forward	0.0921708	0.083977	1.76862	0.0267106	0.291702	1.09757	0.134315

## Sheet: NEG_PANCREAS
id	MS2 name	MS2 score	MS1 name	MS1 ppm	rt	mz	SuperClass	type	MEAN _STZ	MEAN _TAC	VIP	P-VALUE	Q-VALUE	FOLD CHANGE	LOG_FOLDCHANGE
82	Ribitol	0.907097			250.321	151.062	Organic oxygen compounds	forward	0.0938966	0.174124	2.11065	0.000139904	0.209619	0.539251	-0.89097
54	Sorbitol	0.962498			368.048	181.074	Organic oxygen compounds	forward	0.0260077	0.0653303	1.99437	0.00333491	0.428419	0.398095	-1.32882
71	L-Leucine	0.941205			472.674	130.088	Organic acids and derivatives	forward	0.112662	0.0896347	1.94571	0.00747589	0.462213	1.2569	0.32987
193	beta-D-Glucosamine	0.453076			413.565	214.051	Organooxygen compounds	forward	1.59474	2.31572	1.94226	0.0125282	0.474642	0.688657	-0.538143
150	L-Fucose	0.646583			212.41	163.063	Organic oxygen compounds	forward	0.046361	0.110846	1.89377	0.0106663	0.471368	0.418249	-1.25757
118	Bovinocidin	0.767991			119.887	118.015	Organic 1,3-dipolar compounds	forward	0.187086	0.274696	1.86886	0.0152359	0.478022	0.681065	-0.554136
133	Estrone	0.71872			220.049	269.155	Lipids and lipid-like molecules	forward	0.0148238	0.0191125	1.86834	0.0237838	0.48375	0.775607	-0.366603
112	Limocitrin	0.799594			280.771	345.064	Phenylpropanoids and polyketides	forward	0.00835074	0.0301487	1.84605	0.00151298	0.383545	0.276985	-1.85212
104	Aminoadipic acid	0.83185			431.233	160.063	Organic acids and derivatives	forward	0.0662598	0.109692	1.83811	0.0323181	0.486494	0.604054	-0.727251
67	Creatinine	0.950643			178.481	112.052	Organic acids and derivatives	forward	0.0293648	0.058815	1.83637	0.0342995	0.486939	0.499274	-1.0021
88	Dehydroascorbic acid	0.879568			94.2423	173.011	Organoheterocyclic compounds	forward	1.45858	1.85467	1.83181	0.0214476	0.482627	0.786434	-0.346602
21	L-Aspartic acid	0.992483			426.995	132.031	Organic acids and derivatives	forward	5.05949	9.98072	1.82232	0.014449	0.477165	0.506927	-0.980151
96	(R)-mandelic Acid	0.858974			48.9491	151.041	Benzenoids	forward	0.0665039	0.109633	1.81284	0.027087	0.485013	0.606605	-0.72117
185	2,2-Dimethylsuccinic acid	0.499983			5.41748	145.052	Lipids and lipid-like molecules	reverse	0.0243478	0.0310728	1.78266	0.0353048	0.487146	0.783574	-0.351858
36	L-Serine	0.981522			424.231	104.036	Organic acids and derivatives	forward	0.0854218	0.057529	1.74992	0.0223632	0.483095	1.48485	0.570315
131	3,5,7-trihydroxy-2-(4-hydroxyphenyl)-3,4-dihydro-2H-1-benzopyran-4-one	0.728083			427.035	287.054	Phenylpropanoids and polyketides	forward	0.140095	0.360315	1.74347	0.0214505	0.482629	0.388813	-1.36285
114	N-Acetylserine	0.791284			318.86	146.047	Organic acids and derivatives	forward	1.24393	0.910205	1.71549	0.047706	0.488988	1.36664	0.450637
137	Ketoleucine	0.696544			57.1786	129.057	Organic acids and derivatives	forward	0.646658	0.0720355	1.48609	0.015949	0.478727	8.97693	3.16622

## Sheet: Sheet5
MS2 name	MS2 name	MS2 name	MS2 name
Pinostrobin chalcone	Caffeine	D-2,3-Dihydroxypropanoic acid	Ribitol
Isolinderanolide	5-(2-Methylpropyl)tetrahydro-2-oxo-3-furancarboxylic acid	Succinic acid semialdehyde	Sorbitol
PC(18:1(11Z)/P-16:0)	Pinostrobin chalcone	D-Ribose	L-Leucine
PC(22:4(7Z,10Z,13Z,16Z)/15:0)	Albanol B	Methylsuccinic acid	beta-D-Glucosamine
PC(22:6(4Z,7Z,10Z,13Z,16Z,19Z)/18:1(11Z))	Nb-Methyltetrahydroharmol	N-Acetyl-L-alanine	L-Fucose
PC(22:6(4Z,7Z,10Z,13Z,16Z,19Z)/P-16:0)	D-Galactose	(R)-lipoic acid	Bovinocidin
Thymidine	PC(16:1(9Z)/22:1(13Z))	(Z)-Resveratrol	Estrone
6-Methylcoumarin	PC(22:6(4Z,7Z,10Z,13Z,16Z,19Z)/22:2(13Z,16Z))	Pyrrole-2-carboxylic acid	Limocitrin
PC(20:5(5Z,8Z,11Z,14Z,17Z)/22:4(7Z,10Z,13Z,16Z))	PC(22:4(7Z,10Z,13Z,16Z)/15:0)	Aldehydo-D-xylose	Aminoadipic acid
LysoPC(20:4(8Z,11Z,14Z,17Z))	PC(22:5(4Z,7Z,10Z,13Z,16Z)/20:5(5Z,8Z,11Z,14Z,17Z))	2,2-Dimethylsuccinic acid	Creatinine
Cis-zeatin	N-Methyltryptamine	Nicotinic acid	Dehydroascorbic acid
PC(20:4(8Z,11Z,14Z,17Z)/15:0)	(-)-Thebaine		L-Aspartic acid
	1-Hydroxy-3-methoxy-10-methylacridone		(R)-mandelic Acid
	1,2,3,4,Tetrahydro-1,5,7-trimethylnapthalene		2,2-Dimethylsuccinic acid
			L-Serine
			3,5,7-trihydroxy-2-(4-hydroxyphenyl)-3,4-dihydro-2H-1-benzopyran-4-one
			N-Acetylserine
			Ketoleucine
